1  
2  
3  
4  
5  
6  
7  
8  
9  
10  
11  
12  
13  
14  
15  
16  
17  
18  
19  
20  
21  
22

**APC/C<sup>FZR-1</sup> Controls SAS-5 Levels to Regulate Centrosome Duplication in *Caenorhabditis elegans***

Running title: Centrosome Regulation by APC/C<sup>FZR-1</sup>

Jeffrey C. Medley\*, Lauren E. DeMeyer\*, Megan M. Kabara\*, and Mi Hye Song\*.<sup>†</sup>

\* Department of Biological Sciences, Oakland University, Rochester, MI 48309, USA.

<sup>†</sup> To whom correspondence should be addressed.

Contact Information: msong2@oakland.edu

**Key words:** APC/C; FZR-1; *C. elegans*; Centrosome; E3 ubiquitin ligase; Proteasome; SAS-5; ZYG-1

23

## ABSTRACT

24

25 As the primary microtubule-organizing center, centrosomes play a key role in establishing mitotic  
26 bipolar spindles that secure correct transmission of genomic content. For the fidelity of cell division,  
27 centrosome number must be strictly controlled by duplicating only once per cell cycle. Proper levels of  
28 centrosome proteins are shown to be critical for normal centrosome number and function.  
29 Overexpressing core centrosome factors leads to extra centrosomes, while depleting these factors  
30 results in centrosome duplication failure. In this regard, protein turnover by the ubiquitin-proteasome  
31 system provides a vital mechanism for the regulation of centrosome protein levels. Here, we report that  
32 FZR-1, the *Caenorhabditis elegans* homolog of Cdh1/Hct1/Fzr, a co-activator of the anaphase  
33 promoting complex/cyclosome (APC/C), an E3 ubiquitin ligase, functions as a negative regulator of  
34 centrosome duplication in the *Caenorhabditis elegans* embryo. During mitotic cell division in the early  
35 embryo, FZR-1 is associated with centrosomes and enriched at nuclei. Loss of *fzr-1* function restores  
36 centrosome duplication and embryonic viability to the hypomorphic *zyg-1(it25)* mutant, in part, through  
37 elevated levels of SAS-5 at centrosomes. Our data suggest that the APC/C<sup>FZR-1</sup> regulates SAS-5 levels  
38 by directly recognizing the conserved KEN-box motif, contributing to proper centrosome duplication.  
39 Together, our work shows that FZR-1 plays a conserved role in regulating centrosome duplication in  
40 *Caenorhabditis elegans*.

41

42  
43  
44  
45  
46  
47  
48  
49  
50  
51  
52  
53  
54  
55  
56  
57  
58  
59  
60  
61  
62  
63  
64  
65  
66  
67  
68

## INTRODUCTION

The centrosome is a small, non-membranous organelle that serves as the primary microtubule-organizing center in animal cells. Each centrosome consists of a pair of barrel-shaped centrioles that are surrounded by a network of proteins called pericentriolar material (PCM). During mitosis, two centrosomes organize bipolar spindles that segregate genomic content equally into two daughter cells. Thus, tight control of centrosome number is vital for the maintenance of genomic integrity during cell division, by restricting centrosome duplication to once and only once per cell cycle. Erroneous centrosome duplication results in aberrant centrosome number that leads to chromosome missegregation and abnormal cell proliferation and is associated with human disorders including cancers and microcephaly (Nigg and Stearns 2011; Gönczy 2015).

In the nematode *C. elegans*, extensive studies identified a set of core centrosome factors that are absolutely essential for centrosome duplication: the protein kinase ZYG-1 and the coiled-coil proteins SPD2, SAS-4, SAS-5 and SAS-6 (O'Connell *et al.* 2001; Kirkham *et al.* 2003; Leidel and Gönczy 2003; Dammermann *et al.* 2004; Delattre *et al.* 2004; Kemp *et al.* 2004; Pelletier *et al.* 2004; Leidel *et al.* 2005). SPD-2 and ZYG-1 localize early to the site of centriole formation and are required for the recruitment of the SAS-5/SAS-6 complex that sequentially recruits SAS-4 to the centriole (Delattre *et al.* 2006; Pelletier *et al.* 2006). These key factors are also present in other animal systems, suggesting highly conserved evolutionary mechanisms in centrosome duplication. For instance, the human genome contains homologs of the five centrosome factors found in *C. elegans*, Cep192/SPD-2 (Zhu *et al.* 2008), Plk4/ZYG-1 (Habedanck *et al.* 2005), STIL/SAS-5 (Arquint *et al.* 2012), HsSAS-6/SAS-6 (Leidel *et al.* 2005) and CPAP/SAS-4 (Kleylein-Sohn *et al.* 2007; Tang *et al.* 2009) and all these factors are shown to play a critical role in centrosome biogenesis (Fu *et al.* 2015; Gönczy 2015).

Maintaining the proper levels of centrosome proteins is critical for normal centrosome number and function (Kleylein-Sohn *et al.* 2007; Strnad *et al.* 2007; Rogers *et al.* 2009; Tang *et al.* 2009; Holland *et al.* 2010; Brownlee *et al.* 2011; Puklowski *et al.* 2011; Song *et al.* 2011; Tang *et al.* 2011; Meghini *et al.* 2016; Levine *et al.* 2017). In light of this, protein turnover by proteolysis provides a key

69 mechanism for regulating the abundance of centrosome factors. A mechanism regulating protein levels  
70 is their degradation by the 26S proteasome that catalyzes the proteolysis of poly-ubiquitinated  
71 substrates (Livneh *et al.* 2016). The anaphase promoting complex/cyclosome (APC/C) is a multi-  
72 subunit E3 ubiquitin ligase that targets substrates for degradation (Acquaviva and Pines 2006; Peters  
73 2006; Chang and Barford 2014). The substrate specificity of the APC/C is directed through the  
74 sequential, cell cycle-dependent activity of two co-activators, Cdc20/Fzy/FZY-1 (Hartwell and Smith  
75 1985; Dawson *et al.* 1995; Kitagawa *et al.* 2002) and Cdh1/Fzr/Hct1/FZR-1 (Schwab *et al.* 1997; Sigrist  
76 and Lehner 1997; Visintin *et al.* 1997; Fay *et al.* 2002). During early mitosis Cdc20 acts as co-activator  
77 of the APC/C, and Cdh1 functions as co-activator to modulate the APC/C-dependent events at late  
78 mitosis and in G1 (Irniger and Nasmyth 1997; Visintin *et al.* 1997; Fang *et al.* 1998; Prinz *et al.* 1998;  
79 Shirayama *et al.* 1998). Upregulated targets in Cdh1-deficient cells are shown to be associated with the  
80 genomic instability signature of human cancers and show a high correlation with poor prognosis (Carter  
81 *et al.* 2006; Garcia-Higuera *et al.* 2008). Furthermore, a mutation in SIL/STIL (a human homolog of  
82 SAS-5) linked to primary microcephaly (MCPH; Kumar *et al.* 2009) results in deletion of the Cdh1-  
83 dependent destruction motif (KEN-box), leading to deregulated accumulation of STIL protein and  
84 centrosome amplification (Arquint and Nigg 2014). In *Drosophila*, the APC/C<sup>Fzr/Cdh1</sup> directly interacts  
85 with Spd2 through KEN-box recognition and targets Spd2 for degradation (Meghini *et al.* 2016).  
86 Therefore, the APC/C<sup>Cdh1/Fzr/Hct1</sup> plays a critical role in regulating the levels of key centrosome  
87 duplication factors in mammalian cells and flies.

88 In *C. elegans*, FZR-1 has been shown to be required for fertility, cell cycle progression and cell  
89 proliferation during embryonic and postembryonic development via synthetic interaction with *lin-35/Rb*  
90 (Fay *et al.* 2002; The *et al.* 2015). However, the role of FZR-1 in centrosome assembly has not been  
91 described. In this study, we molecularly identified *fzr-1* as a genetic suppressor of *zyg-1*. Our results  
92 suggest that APC/C<sup>FZR-1</sup> negatively regulates centrosome duplication, in part, through proteasomal  
93 degradation of SAS-5 in a KEN-box dependent fashion. Therefore, FZR-1, the *C. elegans* homolog of  
94 Cdh1/Hct1/Fzr, plays a conserved role in centrosome duplication.

95

## MATERIALS AND METHODS

96

97

### 98 ***C. elegans* strains and genetics**

99 A full list of *C. elegans* strains used in this study is listed in Table S1. All strains were derived from the  
100 wild-type Bristol N2 strain using standard genetic methods (Brenner 1974; Church *et al.* 1995).  
101 Strains were maintained on MYOB plates seeded with *E. coli* OP50 and grown at 19° unless otherwise  
102 indicated. The *fzr-1::gfp::3xflag* construct containing 21.6Kbp of the *fzr-1* 5'UTR and 6Kbp of the *fzr-1*  
103 3'UTR was acquired from TransgenOme (construct number: 7127141463160758 F11, Sarov *et al.*  
104 2012), which was used to generate the transgenic line, MTU10, expressing C-terminal GFP-tagged  
105 FZR-1. For the generation of N-terminal GFP-tagged FZR-1 (OC190), we used Gateway cloning  
106 (Invitrogen, Carlsbad, CA, USA) to generate the construct. Coding sequence of *fzr-1* was PCR  
107 amplified from the cDNA clone yk1338f2, and cloned into pDONR221 (Invitrogen) and then the  
108 resulting pDONR construct was recombined into pID3.01 (pMS9.3), which is driven by the *pie-1*  
109 promoter. The transgenes were introduced into worms by standard particle bombardment (Praitis *et al.*  
110 2001). For embryonic viability and brood size assays, individual L4 animals were transferred to clean  
111 plates and allowed to self-fertilize for 24 hours at the temperatures indicated. For brood size assays,  
112 this was repeated until animals no longer produced fertilized embryos. Progeny were allowed at least  
113 24 hours to complete embryogenesis before counting the number of progeny. The *fzr-1(RNAi)*  
114 experiments were performed by RNAi soaking (Song *et al.* 2008). To produce dsRNA for RNAi soaking,  
115 we amplified a DNA template from the cDNA clone yk1338f2 using the primers 5'-  
116 ATGGATGAGCAACCGCC-3' and 5'-GCACTGTACGTAAAAAGTGATC-3' that contained a T7  
117 promoter sequence at their 5' ends. *In vitro* transcription was performed using the T7-MEGAscript kit  
118 (Thermo-Fisher, Hanover park, IL, USA). L4 animals were soaked overnight in M9 buffer containing  
119 either 0.1-0.4 mg dsRNA/mL or no dsRNA (control).

120

### 121 **Mapping and molecular identification of *szy-14***

122 We mated *zyg-1(it25) dpy-10(e128) szy-14(bs31) unc-4(e120)* hermaphrodites with Hawaiian, CB4856  
123 males for single-nucleotide polymorphism mapping (Song *et al.* 2008), and isolated a total of 104  
124 independent Dpy-nonUnc from the F2 generation. After establishing homozygous recombinant lines,  
125 we scored for the presence of *szy-14(bs31)* based on the suppression of the *zyg-1(it25)* mutant  
126 (additionally, reduced brood size; (Fay *et al.* 2002). In parallel, we used *zyg-1(it25)*, *zyg-1(it25) dpy-*  
127 *10(e128)*, *zyg-1(it25) dpy-10(e128) szy-14(bs31) unc-4(e120)*, *zyg-1(it25) szy-14(bs31)*, and *zyg-1(it25)*  
128 *szy-14(bs31) unc-4(e120)* as controls. For the molecular identification of the mutation, we sequenced  
129 several candidate genes (*nos-3*, *kin-15*, *kin-16*, *wee-1.1*, *wee-1.3*, and *fzr-1*) located within an interval  
130 on chromosome II. For sequencing the *fzr-1* gene, we used the following primers: Forward 5'-  
131 TCTTGTTTCTGGTGGAGGT-3' and Reverse 5'- ACACGATACTGATGCCCAA-3' for the *bs31*  
132 suppressor, and Forward 5'- ATGGATGAGCAGCAACCGCC-3' and Reverse 5'-  
133 CAAGCTTGAGCTGTTGG-3' for the *bs38* suppressor. Purified PCR amplicons were sequenced and  
134 aligned to the ORF, ZK1307.6 to identify the nucleotide substitution.

135

### 136 **CRISPR/CAS-9 mediated genome editing**

137 For genome editing, we used the co-CRISPR technique as previously described in *C. elegans* (Arribere  
138 *et al.* 2014; Paix *et al.* 2015). In brief, we microinjected N2 and *zyg-1(it25)* animals using a mixture  
139 containing recombinant SpCas9 (Paix *et al.* 2015), crRNAs targeting *sas-5* and *dpy-10* at 0.4-0.8 $\mu$ g/ $\mu$ L,  
140 tracrRNA at 12 $\mu$ g/ $\mu$ L, and single-stranded DNA oligonucleotides to repair *sas-5* and *dpy-10* at 25-  
141 100ng/ $\mu$ L. Microinjection was performed using the XenoWorks microinjector (Sutter Instruments,  
142 Novato, CA, USA) with a continuous pulse setting at 400-800 hPa. All RNA and DNA oligonucleotides  
143 used in this study were synthesized by Integrated DNA Technologies (IDT, Coralville, IA, USA) and are  
144 listed in Table S2. As we were unable to engineer a silent mutation into the PAM sequence used by the  
145 *sas-5* crRNA, we introduced six silent mutations to *sas-5* (aa 201-206; Figure 5A) by mutating 8 out of  
146 20 the nucleotides that comprise the *sas-5* crRNA, in order to disrupt Cas9 recognition after homology-  
147 directed repair. After injection, animals were allowed to produce F1 progeny that were monitored for the  
148 presence of *dpy-10(cn64)/+* rollers. To identify the *sas-5*<sup>KEN-to-3A</sup> mutation, we extracted genomic DNA

149 from broods containing the highest frequency of F1 rollers. Using the primers, forward: 5'-  
150 TGCCCAAATACGACAACG-3' and reverse: 5'-TACTACTCACGTCTGCT-3', we amplified the  
151 region of *sas-5* containing the KEN-box sequence. As the repair template for the *sas-5*<sup>KEN-to-3A</sup> mutation  
152 introduces an *Hpy8I* restriction enzyme (NEB, Ipswich, MA, USA) cutting site, we used an *Hpy8I*  
153 enzyme digestion to test for the introduction of our targeted mutation. After isolating homozygotes  
154 based on the *Hpy8I* cutting, we confirmed the SAS-5<sup>KEN-to-3A</sup> mutation by genomic DNA sequencing.  
155 Sequencing revealed that several lines were homozygous for the SAS-5<sup>KEN-to-3A</sup> mutation (Table S1,  
156 Figure 5A). However, the strain MTU14, contained all of the silent mutations that we designed to disrupt  
157 Cas9 recognition without affecting the KEN-box (Table S1, Figure 5A). Thus, we used MTU14 as a  
158 control for our assays.

159

## 160 **Cytological analysis**

161 To perform immunostaining, the following antibodies were used at 1:2,000-3,000 dilutions:  $\alpha$ -Tubulin  
162 (DM1a; Sigma, St-Louis, MO, USA),  $\alpha$ -GFP: IgG<sub>1K</sub> (Roche, Indianapolis, IN, USA),  $\alpha$ -ZYG-1  
163 (Stubenvoll *et al.* 2016),  $\alpha$ -TBG-1(Stubenvoll *et al.* 2016),  $\alpha$ -SAS-4 (Song *et al.* 2008),  $\alpha$ -SAS-5  
164 (Medley *et al.* 2017), and Alexa Fluor 488 and 561 (Invitrogen, Carlsbad, CA, USA) as secondary  
165 antibodies. Confocal microscopy was performed as described (Stubenvoll *et al.* 2016) using a Nikon  
166 Eclipse Ti-U microscope equipped with a Plan Apo 60 x 1.4 NA lens, a Spinning Disk Confocal (CSU  
167 X1) and a Photometrics Evolve 512 camera. Images were acquired using MetaMorph software  
168 (Molecular Devices, Sunnyvale, CA, USA). MetaMorph was used to draw and quantify regions of  
169 fluorescence intensity and Adobe Photoshop CS6 was used for image processing. To quantify  
170 centrosomal SAS-5 signals, the average intensity within an 8-pixel (1 pixel = 0.151  $\mu$ m) diameter region  
171 was measured within an area centered on the centrosome and the focal plane with the highest average  
172 intensity was recorded. Centrosomal TBG-1 ( $\gamma$ -tubulin) levels were quantified in the same manner,  
173 except that a 25-pixel diameter region was used. For both SAS-5 and TBG-1 quantification, the  
174 average fluorescence intensity within a 25-pixel diameter region drawn outside of the embryo was used  
175 for background subtraction.

176

177 **Immunoprecipitation (IP)**

178 Embryos were collected from gravid worms using hypochlorite treatment (1:2:1 ratio of M9 buffer,  
179 5.25% sodium hypochlorite and 5M NaCl), washed with M9 buffer five times and frozen in liquid  
180 nitrogen. Embryos were stored at -80° until use. IP experiment using  $\alpha$ -GFP were performed following  
181 the protocol described previously (Stubenvoll *et al.* 2016). 20  $\mu$ L of Mouse- $\alpha$ -GFP magnetic beads  
182 (MBL, Naka-ku, Nagoya, Japan) were used per reaction. The  $\alpha$ -GFP beads were prepared by washing  
183 twice for 15 minutes in PBST (PBS; 0.1% Triton-X), followed by a third wash in 1x lysis buffer (50 mM  
184 HEPES [pH 7.4], 1mM EDTA, 1mM MgCl<sub>2</sub>, 200 mM KCl, and 10% glycerol (v/v)) (Cheeseman *et al.*  
185 2004). Embryos were suspended in 1 x lysis buffer supplemented with complete protease inhibitor  
186 cocktail (Roche, Indianapolis, IN, USA) and MG132 (Tocris, Avonmouth, Bristol, UK). The embryos  
187 were then milled for three minutes at 30 Hz using a Retsch MM 400 mixer-mill (Verder Scientific,  
188 Newtown, PA, USA). Lysates were sonicated for three minutes in ice water using an ultrasonic bath  
189 (Thermo-Fisher, Hanover Park, IL, USA). Samples were spun at 45,000RPM for 45 minutes using a  
190 Sorvall RC M120EX ultracentrifuge (Thermo-Fisher, Hanover Park, IL, USA). The supernatant was  
191 transferred to clean microcentrifuge tubes. Protein concentration was quantified using a NanoDrop  
192 spectrophotometer (Thermo-Fisher, Hanover Park, IL, USA) and equivalent amount of total proteins  
193 was used for each reaction. Samples and  $\alpha$ -GFP beads were incubated and rotated for one hour at 4°C  
194 and then washed five times for five minutes using PBST (PBS + 0.1% Triton-X 100). Samples were  
195 resuspended in 20  $\mu$ L of a solution containing 2X Laemmli Sample Buffer (Sigma, St-Louis, MO, USA)  
196 and 10%  $\beta$ -mercaptoethanol (v/v), then boiled for five minutes. For protein input, 5  $\mu$ L of embryonic  
197 lysates were diluted using 15  $\mu$ L of a solution containing 2X Laemmli Sample Buffer and 10%  $\beta$ -  
198 mercaptoethanol (v/v) and boiled for 5 minutes before fractionating on a 4-12% NuPAGE Bis-Tris gel  
199 (Invitrogen, Carlsbad, CA, USA).

200

201 **Western Blotting**



202 For western blotting, samples were sonicated for five minutes and boiled in a solution of 2X Laemmli  
203 Sample Buffer and 10%  $\beta$ -mercaptoethanol before being fractionated on a 4-12% NuPAGE Bis-Tris gel  
204 (Invitrogen, Carlsbad, CA, USA). The iBlot Gel Transfer system (Invitrogen, Carlsbad, CA, USA) was  
205 then used to transfer samples to a nitrocellulose membrane. The following antibodies were used at  
206 1:3,000-10,000 dilutions:  $\alpha$ -Tubulin:  $\alpha$ -Tubulin (DM1a; Sigma, St-Louis, MO, USA),  $\alpha$ -GFP: IgG<sub>1k</sub>  
207 (Roche, Indianapolis, IN, USA),  $\alpha$ -SAS-5 (Song *et al.* 2011) and  $\alpha$ -TBG-1 (Stubenvoll *et al.* 2016).  
208 IRDye secondary antibodies (LI-COR Biosciences, Lincoln, NE, USA) were used at a 1:10,000 dilution.  
209 Blots were imaged using the Odyssey infrared scanner (LI-COR Biosciences, Lincoln, NE, USA), and  
210 analyzed using Image Studio software (LI-COR Biosciences, Lincoln, NE, USA).

211

## 212 **Statistical Analysis**

213 All *p*-values were calculated using two-tailed t-tests assuming equal variance among sample groups.  
214 Statistics are presented as Average  $\pm$  standard deviation (SD) unless otherwise specified. Data were  
215 independently replicated at least three times for all experiments and subsequently analyzed for  
216 statistical significance.

217

## 218 **Data Availability**

219 All strains used in this study are available upon request. The following supplemental materials are  
220 uploaded.

221 Figure S1. Centrosome-associated TBG-1 levels are unaffected in *fzr-1(bs31)* and *sas-5<sup>KEN-to-3A</sup>* mutant  
222 embryos.

223 Figure S2. Brood size in *sas-5<sup>KEN-to-3A</sup>* and *fzr-1(bs31)* mutants.

224 Figure S3. SAS-5 levels are increased in *sas-5<sup>KEN-to-3A</sup>* mutants.

225 Table S1. List of strains used in this study.

226 Table S2. List of oligonucleotides used for CRISPR/Cas9 genome editing.

227

228

## 229 RESULTS AND DISCUSSION

230

### 231 **The *szy-14* mutation restores centrosome duplication to *zyg-1(it25)* mutants**

232 Through a genetic suppressor screen (Kemp *et al.* 2007), the *szy-14* (suppressor of *zyg-1*) gene was  
233 originally identified that restores embryonic viability of the partial loss-of-function *zyg-1(it25)* mutant.

234 The *zyg-1(it25)* mutant embryo grown at the restrictive temperature (24°) fails to duplicate centrosomes  
235 during the first cell cycle, resulting in monopolar spindles at the second mitosis and 100% embryonic  
236 lethality (O'Connell *et al.* 2001). A complementation test identified two alleles, *szy-14(bs31)* and *szy-*  
237 *14(bs38)*, of the *szy-14* mutation that partially restore the embryonic viability of *zyg-1(it25)* but show  
238 slow growth phenotype without obvious cytological defects, indicating that the *szy-14* gene is not  
239 essential for embryonic viability (Table 1, (Kemp *et al.* 2007).

240 Given that ZYG-1 is essential for proper centrosome duplication (O'Connell *et al.* 2001), we  
241 speculated that the *szy-14* mutation might suppress the embryonic lethality of *zyg-1(it25)* mutants via  
242 restoration of centrosome duplication. To examine centrosome duplication events, we quantified the  
243 percentage of bipolar spindles at the second mitosis, which indicates successful centrosome  
244 duplication during the first cell cycle (Figure 1A and B). At the restrictive temperature 24°, both double  
245 mutant embryos, *zyg-1(it25); szy-14(bs31)* (79.9±22.0%) and *zyg-1(it25); szy-14(bs38)* (51.4±24.4%)  
246 produced bipolar spindles at a significantly higher rate, compared to *zyg-1(it25)* single mutant embryos  
247 (3.3±4.4%) (Figure 1B). Our observation suggests that the *szy-14* mutation restores centrosome  
248 duplication in *zyg-1(it25)* embryos, thereby restoring embryonic viability to *zyg-1(it25)* mutants.

249

### 250 **Molecular identification of *szy-14***

251 The *szy-14* gene was initially mapped to the right arm of chromosome II between the morphological  
252 markers *dpy-10* and *unc-4* (Kemp *et al.* 2007). Using fine physical mapping, we located *szy-14* to an  
253 interval of 161-Kb (ChrII: 9621265..9782352; Wormbase.org) that contains several known cell cycle  
254 regulators. Based on the genetic map position of the *szy-14* suppressor, we sequenced candidate  
255 genes within this interval to detect any mutations in *szy-14* mutants. Sequencing revealed that *szy-*

256 *14(bs38)* mutants contain a single substitution (C-to-T) in exon 2, and *szy-14(bs31)* mutants carry a  
257 mutation (G-to-A) in exon 5 of the ORF ZK1307.6 that corresponds to the *fzr-1* gene. Consistently,  
258 inhibiting FZR-1 by RNAi soaking partially restores embryonic viability in both *zyg-1(it25)* and *zyg-*  
259 *1(or409)* mutant alleles (Table 1), indicating that loss-of-function of *fzr-1* leads to the restoration of  
260 embryonic viability to the *zyg-1* mutants. Together, we determined that the *bs31* and *bs38* mutations  
261 are alleles of the *fzr-1* gene. Hereafter, we refer to *szy-14(bs31)* and *szy-14(bs38)* mutants as *fzr-*  
262 *1(bs31)* and *fzr-1(bs38)* mutants, respectively.

263 *fzr-1* encodes a conserved co-activator of the anaphase promoting complex/cyclosome  
264 (APC/C), the *C. elegans* homolog of Cdh1/Hct1/Fzr (Schwab *et al.* 1997; Sigrist and Lehner 1997;  
265 Visintin *et al.* 1997; Fay *et al.* 2002). The APC/C is an E3 ubiquitin ligase that orchestrates the  
266 sequential degradation of key cell cycle regulators during mitosis and early interphase (Song and Rape  
267 2008). As part of this process, specific activators modulate the APC/C activity in different phases of  
268 mitosis. Specifically, FZR-1/Cdh1 modulates the APC/C at late mitosis and events in G1 during the time  
269 when centrosome duplication occurs. In each of the *fzr-1* mutant alleles, the single substitution leads to  
270 a missense mutation (Figure 1C). The *fzr-1(bs31)* mutation results in a missense mutation (C612Y)  
271 within the conserved WD40 repeat domain that is known to be involved in protein-protein interactions  
272 and is important for substrate recognition (Kraft *et al.* 2005; He *et al.* 2013). The *fzr-1(bs38)* mutation  
273 produces a missense mutation (R65C) at the conserved C-box of FZR-1. The C-box is known to be  
274 crucial for the physical interaction between FZR-1 and other APC/C subunits (Schwab *et al.* 2001;  
275 Thornton *et al.* 2006; Chang *et al.* 2015; Zhang *et al.* 2016). Thus, both *fzr-1(bs31)* and *fzr-1(bs38)*  
276 mutations appear to affect conserved domains that are critical for the function of the APC/C complex,  
277 suggesting that FZR-1 might regulate centrosome duplication through the APC/C complex.

## 278

### 279 **FZR-1 localizes to nuclei and centrosomes during early cell division**

280 To determine where FZR-1 might function during the early cell cycle, we produced two independent  
281 transgenic strains that express FZR-1 tagged with GFP at the N- or C-terminus (see method and  
282 materials). To label microtubules, we mated GFP-tagged FZR-1 transgenic animals with the

283 mCherry:: $\beta$ -tubulin expressing line, and performed 4D time-lapse movies to observe subcellular  
284 localization of FZR-1 throughout the first cell cycle (Figure 2A). Confocal imaging illustrates that during  
285 interphase and early mitosis, FZR-1 is highly enriched at the nuclei. After the nuclear envelope breaks  
286 down (NEBD), FZR-1 diffuses to the cytoplasm and reappears to the nuclei at late mitosis when the  
287 nuclear envelop reforms. After NEBD, FZR-1 becomes apparent at spindle microtubules, and  
288 centrosomes that co-localize with SPD-2, a centrosome protein (Figure 2B). Both GFP-tagged FZR-1  
289 transgenic embryos exhibit similar subcellular distributions, except a slight difference in fluorescent  
290 intensity (not shown). Our observations suggest that *C. elegans* FZR-1 might direct APC/C activity at  
291 centrosomes during late mitosis in early embryos, which is consistent with the role of FZR-1 as the co-  
292 activator of the APC/C at late mitosis in other organisms (Raff *et al.* 2002; Zhou *et al.* 2003; Meghini *et*  
293 *al.* 2016).

294

### 295 **FZR-1 might function as a part of the APC/C complex to regulate centrosome duplication**

296 Given that FZR-1 is a conserved co-activator of the APC/C, an E3 ubiquitin ligase, we hypothesized  
297 that FZR-1 functions as a part of the APC/C complex in centrosome assembly. If so, depleting other  
298 APC/C subunits should have a similar effect that loss of FZR-1 had on the *zyg-1(it25)* mutant. To  
299 examine how other core subunits of the APC/C complex might affect *zyg-1(it25)* mutants, we mated the  
300 *zyg-1(it25)* strain with *mat-3(or180)* mutants for the core APC8/CDC23 subunit (Golden *et al.* 2000),  
301 and *emb-1(hc57)* mutants for the conserved subunit APC16 in the *C. elegans* APC/C complex (Kops *et*  
302 *al.* 2010; Green *et al.* 2011; Shakes *et al.* 2011). By generating double homozygote mutants, we  
303 assayed for bipolar spindle formation and embryonic viability in *zyg-1(it25); mat-3(or180)* and *zyg-*  
304 *1(it25); emb-1(hc57)* double homozygous mutants (Figure 3, Table 1). At the restrictive temperature  
305 24°, *zyg-1(it25); mat-3(or180)* double mutant embryos exhibit a 9-fold increase in bipolar spindle  
306 formation (81.8 $\pm$ 14.3%), compared to *zyg-1(it25)* single mutant embryos (9.1 $\pm$ 8.8%) during the second  
307 mitosis (Figure 3A). Consistently, 5% of *zyg-1(it25); mat-3(or180)* double mutants produce viable  
308 progeny while 100% of *zyg-1(it25)* or *mat-3(or180)* single mutant progeny die at 24° (Table 1). In  
309 support of our results, the *mat-3(bs29)* allele has been reported as a genetic suppressor of *zyg-1* (Miller

310 *et al.* 2016). Furthermore, we observed that the *emb-1* mutation suppresses the centrosome duplication  
311 phenotype of *zyg-1(it25)* mutants at the semi-restrictive temperature 22.5°. While 45.5±11.9% of *zyg-*  
312 *1(it25)* embryos form bipolar spindles, 79.1±12.4% of *zyg-1(it25); emb-1(hc57)* double mutant embryos  
313 produce bipolar spindles (Figure 3A). We, however, observed no significant restoration of embryonic  
314 viability in *zyg-1(it25); emb-1(hc57)* double mutants ( $p=0.691$ ) compared to *zyg-1(it25)* single mutants  
315 (Table 1), presumably due to the strong embryonic lethality by the *emb-1(hc57)* mutation itself (Kops *et*  
316 *al.* 2010; Shakes *et al.* 2011). Our results indicate that the APC/C complex functions to suppress the  
317 phenotype of *zyg-1(it25)* mutants. Therefore, FZR-1 might function as a component of the APC/C  
318 complex to regulate centrosome duplication in early *C. elegans* embryos.

319

### 320 **Loss of FZR-1 results in elevated SAS-5 levels**

321 Next we wanted to understand how FZR-1 contributes to centrosome duplication. Since FZR-1 appears  
322 to function through the APC/C complex in centrosome assembly, we hypothesized that the APC/C<sup>FZR-1</sup>  
323 specifically targets one or more centrosome regulators for ubiquitin-mediated degradation. If that is the  
324 case, depleting FZR-1 should protect substrates from degradation leading to accumulation of target  
325 proteins. To identify a direct substrate of APC/C<sup>FZR-1</sup> that regulates centrosome assembly, we utilized  
326 the conserved FZR-1 co-activator specific recognition motif, KEN-box, to screen for a potential  
327 substrate (Glotzer *et al.* 1991; Pflieger and Kirschner 2000; Song and Rape 2011). The KEN-box  
328 appears to be the major degron motif that APC/C<sup>FZR-1</sup> recognizes in centrosome duplication (Strnad *et*  
329 *al.* 2007; Tang *et al.* 2009; Arquint and Nigg 2014; Meghini *et al.* 2016). In human cells, HsSAS-6,  
330 STIL/SAS-5, and CPAP/SAS-4 contain KEN-box motif, and APC/C<sup>Cdh1/FZR-1</sup> targets these proteins for  
331 ubiquitin-mediated proteolysis, thereby preventing extra centrosomes (Strnad *et al.* 2007; Tang *et al.*  
332 2009; Arquint *et al.* 2012; Arquint and Nigg 2014). The *Drosophila* APC/C<sup>Fzr/Cdh1/FZR-1</sup> is also shown to  
333 target Spd2 for destruction through direct interaction with a KEN-box (Meghini *et al.* 2016). Interestingly  
334 in *C. elegans*, a putative KEN-box motif is present in SAS-5 but none in SAS-4 and SAS-6, which  
335 indicates an evolutionary divergence between humans and nematodes.

336 Protein stabilization by the *fzr-1* mutation might lead to increased levels of a centrosome-  
337 associated substrate, which may compensate for impaired ZYG-1 function at the centrosome. In *C.*  
338 *elegans*, SAS-5 is the only core centrosome duplication factor containing a KEN-box, which suggests  
339 SAS-5 as a potential target of the APC/C<sup>FZR-1</sup>. If the APC/C<sup>FZR-1</sup> targets SAS-5 directly through KEN-box  
340 for ubiquitin-mediated proteolysis, inhibiting FZR-1 should protect SAS-5 from degradation leading to  
341 SAS-5 accumulation. To examine how the *fzr-1* mutation affected SAS-5 stability, we immunostained  
342 embryos with anti-SAS-5, and quantified the fluorescence intensity of centrosome-associated SAS-5  
343 (Figure 4A and 4B). As ZYG-1 is required for SAS-5 localization to centrosomes, hyper-accumulation of  
344 SAS-5 might compensate for partial loss-of-function of ZYG-1, thereby restoring centrosome duplication  
345 to *zyg-1(it25)* mutants. In fact, our quantitative immunofluorescence revealed that *fzr-1(bs31)* embryos  
346 exhibit a significant increase (1.41±0.42 fold;  $p<0.001$ ) in centrosomal SAS-5 levels at the first  
347 anaphase, compared to wild-type (Figure 4B). Consistently, compared to *zyg-1(it25)* single mutants,  
348 *zyg-1(it25); fzr-1(bs31)* double mutant embryos exhibit a 1.48-fold increase ( $p<0.001$ ) in centrosome-  
349 associated SAS-5 levels (Figure 4B). Indeed, centrosomal SAS-5 are restored to near wild-type levels  
350 in *zyg-1(it25); fzr-1(bs31)* double mutants (0.95±0.44 fold;  $p=0.003$ ). We, however, observed no  
351 significant changes in centrosomal TBG-1 ( $\gamma$ -tubulin) levels in *fzr-1(bs31)* mutants (Figure S1).

352 Elevated protein levels might influence centrosome-associated SAS-5 levels in *fzr-1(bs31)*  
353 mutants. To determine how inhibition of the APC/C<sup>FZR-1</sup> affected overall protein levels, we performed  
354 quantitative western blot analysis using embryonic protein lysates and antibodies against centrosome  
355 proteins (Figure 4C). Our data indicate that *fzr-1(bs31)* embryos possess increased SAS-5 levels (~1.5-  
356 fold), relative to wild-type embryos, while the levels of SAS-6 and TBG-1 are not significantly affected in  
357 *fzr-1(bs31)* mutants (Figure 4C). Our observation on the SAS-6 levels in *fzr-1(bs31)* mutants is  
358 consistent with previous work by Miller *et al.*, 2016, showing no increase in SAS-6 levels by the *mat-*  
359 *3(bs29)/APC8* mutation that inhibits the APC/C function. These results suggest that *C. elegans* utilizes  
360 a different mechanism to control SAS-6 levels, unlike Human SAS-6 that is regulated by the APC/C-  
361 mediated proteolysis (Strnad *et al.* 2007). Furthermore, our immunoprecipitation suggests a physical  
362 interaction between SAS-5 and FZR-1 in *C. elegans* embryos (Figure 4D), supporting that SAS-5 might

363 be a direct substrate of the APC/C<sup>FZR-1</sup>. Consistent with our results in this study, prior study has shown  
364 that inhibiting the 26S proteasome leads to increased levels of SAS-5 (Song *et al.* 2011). Thus, SAS-5  
365 levels are likely to be controlled through the ubiquitin-proteasome system.

366 Collectively, our data show that the *fzr-1* mutation leads to a significant increase in both cellular  
367 and centrosomal levels of SAS-5, suggesting that the APC/C<sup>FZR-1</sup> might control SAS-5 levels via  
368 ubiquitin-mediated proteasomal degradation to regulate centrosome assembly in the *C. elegans*  
369 embryo.

370

### 371 **Mutation of the KEN-box stabilizes SAS-5**

372 If the APC/C<sup>FZR-1</sup> directly targets substrates for destruction via the conserved KEN-box, mutating this  
373 motif should cause substantial resistance to the ubiquitination-mediated degradation. To determine  
374 whether the APC/C<sup>FZR-1</sup> targets SAS-5 through the KEN-box motif, we mutated the KEN-box at the  
375 endogenous *sas-5* locus. By using CRISPR/CAS-9 mediated genome editing (Paix *et al.* 2015), we  
376 generated mutant lines (*sas-5*<sup>KEN-to-3A</sup>) carrying alanine substitutions of the SAS-5 KEN-box (Figure 5A).  
377 The *sas-5*<sup>KEN-to-3A</sup> mutant embryo exhibits no obvious cell cycle defects or embryonic lethality (Table 1),  
378 consistent with *fzr-1* mutants (Kemp *et al.*, 2007). *sas-5*<sup>KEN-to-3A</sup> animals exhibit a slightly reduced  
379 (~80%) and irregular distribution of brood size within the population (Figure S2). Reduced brood size  
380 and slow growth phenotypes were previously reported in *fzr-1* mutant alleles (Fay *et al.* 2002; Kemp *et*  
381 *al.* 2007).

382 Next, we asked how the *sas-5*<sup>KEN-to-3A</sup> mutation affected *zyg-1(it25)* mutants. If the APC/C<sup>FZR-1</sup>-  
383 mediated proteolysis of SAS-5 accounts for the suppression of *zyg-1*, *sas-5*<sup>KEN-to-3A</sup> mutants should  
384 mimic the *fzr-1* mutation that suppresses *zyg-1* mutants. By mating the *sas-5*<sup>KEN-to-3A</sup> mutant with *zyg-*  
385 *1(it25)* animals, we tested whether the *sas-5*<sup>KEN-to-3A</sup> mutation could genetically suppress *zyg-1* mutants,  
386 by assaying for embryonic viability and centrosome duplication (Table 1, Figure 5B). For the *zyg-1(it25)*  
387 mutant control in this experiment, we used the strain MTU14 [*zyg-1(it25); sas-5*<sup>KEN-to-KEN</sup>, Table S1] that  
388 contains the equivalent modifications, except the KEN-box, to the *sas-5*<sup>KEN-to-3A</sup> mutation (Figure 5A,  
389 see methods and materials). At the semi-restrictive temperature 22.5°, *zyg-1(it25); sas-5*<sup>KEN-to-3A</sup>

390 animals lead to a 7.7-fold increase in the frequency of viable progeny ( $35.3 \pm 9.2\%$ ;  $p < 0.0001$ ),  
391 compared to *zyg-1(it25); sas-5<sup>KEN-to-KEN</sup>* mutant controls ( $4.6 \pm 4.0\%$ ) (Table 1). Consistently, *zyg-1(it25);*  
392 *sas-5<sup>KEN-to-3A</sup>* embryos exhibit successful bipolar spindle assembly at a significantly higher rate  
393 ( $67.5 \pm 16.3\%$ ;  $p = 0.02$ ) than *zyg-1(it25); sas-5<sup>KEN-to-KEN</sup>* embryos ( $35.1 \pm 10.7\%$ ) at the two-cell stage  
394 (Figure 5B). These results suggest that the *sas-5<sup>KEN-to-3A</sup>* mutation does partially restore embryonic  
395 viability and centrosome duplication to *zyg-1(it25)* mutants at  $22.5^\circ$ . However, at the restrictive  
396 temperature  $24^\circ$  where the *fzr-1* mutation shows a strong suppression (Table 1, Figure 1B), both *zyg-*  
397 *1(it25); sas-5<sup>KEN-to-3A</sup>* double mutants and *zyg-1(it25); sas-5<sup>KEN-to-KEN</sup>* mutant animals result in 100%  
398 embryonic lethality (Table 1). *zyg-1(it25); sas-5<sup>KEN-to-3A</sup>* embryos ( $14.7\%$  bipolar,  $n = 68$ ) grown at  $24^\circ$   
399 show only minor effect on centrosome duplication compared to *zyg-1(it25); sas-5<sup>KEN-to-KEN</sup>* control  
400 embryos ( $7.6\%$  bipolar,  $n = 66$ ). The data obtained at  $24^\circ$  reveal that the *sas-5<sup>KEN-to-3A</sup>* mutation results in  
401 much weaker suppression to *zyg-1(it25)* mutants than the *fzr-1* mutation, suggesting that the SAS-5  
402 KEN-box mutation does not generate the equivalent impact that results from the *fzr-1* mutation. If SAS-  
403 5 is the only APC/C<sup>FZR-1</sup> substrate that contributes to the suppression of *zyg-1* mutants, the *fzr-1* or  
404 KEN-box mutation might influence SAS-5 stability differently. In this scenario, FZR-1 might target SAS-  
405 5 through KEN-box and additional recognition motifs (e.g., D-box), causing a greater effect on SAS-5  
406 stability than the KEN-box mutation alone. To examine how the KEN-box mutation affected SAS-5  
407 stability, we measured the fluorescence intensity of SAS-5 at centrosomes by quantitative  
408 immunofluorescence (Figure 5C and 5D). At  $22.5^\circ$  where the *sas-5<sup>KEN-to-3A</sup>* mutation restores  
409 centrosome duplication and embryonic viability to *zyg-1(it25)*, *sas-5<sup>KEN-to-3A</sup>* mutants exhibit a significant  
410 increase in centrosome-associated SAS-5 levels ( $\sim 1.5$ -fold,  $p < 0.001$ ), compared to wild-type (Figure  
411 5C and D). Consistently, *zyg-1(it25); sas-5<sup>KEN-to-3A</sup>* embryos display  $\sim 1.4$ -fold ( $p = 0.002$ ) increased SAS-  
412 5 levels at centrosomes, compared to *zyg-1(it25); sas-5<sup>KEN-to-KEN</sup>* control embryos that contain reduced  
413 centrosomal SAS-5 levels (Figure 5D). Notably, *zyg-1(it25); sas-5<sup>KEN-to-3A</sup>* embryos exhibit centrosomal  
414 SAS-5 levels nearly equivalent ( $\sim 0.97$  fold) to those of wild-type embryos (Figure 5D). As a control, we  
415 also quantified centrosomal TBG-1 levels but saw no changes between *sas-5<sup>KEN-to-3A</sup>* mutants and the  
416 wild-type (Figure S1). Furthermore, we examined overall SAS-5 levels by quantitative western blot,



417 finding that relative to wild-type embryos, *sas-5*<sup>KEN-to-3A</sup> mutant embryos possess ~1.5-fold increased  
418 SAS-5 levels (Figure S3). Together, our quantification data reveal that the *sas-5*<sup>KEN-to-3A</sup> or *fzr-1*  
419 mutation leads to nearly equivalent fold change (~1.5-fold) in both cellular and centrosome-associated  
420 SAS-5 levels (Figure 4B, 4C, 5D and S3). Together, these results suggest that APC/C<sup>FZR-1</sup> directly  
421 targets SAS-5 in a KEN-box dependent manner to control SAS-5 turnover, and that SAS-5 stabilization  
422 by blocking proteolysis results in elevated SAS-5 levels at the centrosome, partially contributing to the  
423 suppression of the *zyg-1(it25)* mutation. In human cells, APC/C<sup>Cdh1</sup> recognizes a KEN-box to regulate  
424 the levels of STIL, the homolog of *C. elegans* SAS-5, and STIL depleted of the KEN-box leads to  
425 accumulation of STIL protein, and centrosome amplification (Arquint and Nigg 2014). While we do not  
426 observe extra centrosomes by the SAS-5 KEN-box mutation, our data show that that APC/C<sup>FZR-1</sup>  
427 controls SAS-5 stability via the direct recognition of the conserved degron motif, KEN-box, to regulate  
428 centrosome duplication in *C. elegans* embryos, suggesting a conserved mechanism for regulating SAS-  
429 5 levels between humans and nematodes.

430 Interestingly, although either inhibiting FZR-1 or mutating KEN-box influences SAS-5 stability at  
431 a comparable level, we observe a notable difference in the suppression level by these two mutations.  
432 Weaker suppression by the *sas-5*<sup>KEN-to-3A</sup> mutation suggests that the APC/C<sup>FZR-1</sup> might target additional  
433 substrates that cooperatively support the *zyg-1* suppression. In this scenario, APC/C<sup>FZR-1</sup> might target  
434 other centrosome proteins outside core duplication factors through the conserved degron motifs, such  
435 as destruction (D)-box and KEN-box (Glotzer *et al.* 1991; Pfleger and Kirschner 2000). Alternatively,  
436 APC/C<sup>FZR-1</sup> might target additional core centrosome factors through other recognition motifs other than  
437 KEN-box, such as D-box (Glotzer *et al.* 1991) or unknown motif in the *C. elegans* system. In humans  
438 and flies, APC/C<sup>Cdh1/Fzr</sup> has been shown to regulate the levels of STIL/SAS-5, Spd2, HsSAS-6 and  
439 CPAP/SAS-4 (Strnad *et al.* 2007; Tang *et al.* 2009; Arquint and Nigg 2014; Meghini *et al.* 2016). While  
440 *C. elegans* homologs of these factors, except SAS-5, lack a KEN-box, all five centrosome proteins  
441 contain at least one putative D-box. An intriguing possibility, given the strong genetic interaction  
442 observed between *fzr-1* and *zyg-1*, is that ZYG-1 could be a novel substrate of APC/C<sup>FZR-1</sup>. Additional  
443 work will be required to understand the complete mechanism of APC/C<sup>FZR-1</sup>- dependent regulation of

444 centrosome duplication in *C. elegans*. In summary, our study shows the APC/C<sup>FZR-1</sup>-dependent  
445 proteolysis of SAS-5 partially contributes to the suppression of the *zyg-1* mutants, and we report that  
446 FZR-1 functions as a negative regulator of centrosome duplication in *C. elegans*.

447

448

### Acknowledgements

449 We thank members of Song lab (Naomi Haque, Brittany Rettig and Michael Stubenvoll) for their  
450 technical support, Kevin O'Connell and Andy Golden for RNAi and worm stains. We especially thank  
451 WormBase and the *Caenorhabditis* Genetics Center (CGC). WormBase is supported by grant U41  
452 HG002223 from the National Human Genome Research Institute at the US National Institutes of  
453 Health, the UK Medical Research Council and the UK Biotechnology and Biological Sciences Research  
454 Council. The CGC (St. Paul, MN), is funded by the National Institutes of Health Office of Research  
455 Infrastructure Programs (P40 OD010440).

456

457

### Competing Interests

458 No competing interests declared.

459

460

### Author Contributions

461 J.C.M. and M.H.S. designed the experiments and wrote the manuscript. J.C.M. and M.H.S. performed  
462 quantifications of confocal imaging and protein levels from western blots. J.C.M., L.E.D. M.M.K., and  
463 M.H.S. performed experiments and provided data.

464

465

### Funding

466 This work was supported by a grant [7R15GM11016-02 to M.H.S.] from the National Institute of  
467 General Medical Sciences, and Research Excellence Fund (to M.H.S) from the Center for Biomedical  
468 Research at Oakland University. The funders had no role in study design, data collection and analysis,  
469 decision to publish, or preparation of the manuscript.

470

471

## References

- 472 Acquaviva, C., and J. Pines, 2006 The anaphase-promoting complex/cyclosome: APC/C. *J Cell Sci*  
473 119: 2401-2404.
- 474 Arquint, C., and E. A. Nigg, 2014 STIL microcephaly mutations interfere with APC/C-mediated  
475 degradation and cause centriole amplification. *Curr Biol* 24: 351-360.
- 476 Arquint, C., K. F. Sonnen, Y. D. Stierhof and E. A. Nigg, 2012 Cell-cycle-regulated expression of STIL  
477 controls centriole number in human cells. *J Cell Sci* 125: 1342-1352.
- 478 Arribere, J. A., R. T. Bell, B. X. Fu, K. L. Artilles, P. S. Hartman *et al.*, 2014 Efficient marker-free  
479 recovery of custom genetic modifications with CRISPR/Cas9 in *Caenorhabditis elegans*. *Genetics*  
480 198: 837-846.
- 481 Brenner, S., 1974 The genetics of *Caenorhabditis elegans*. *Genetics* 77: 71-94.
- 482 Brownlee, C. W., J. E. Klebba, D. W. Buster and G. C. Rogers, 2011 The Protein Phosphatase 2A  
483 regulatory subunit Twins stabilizes Plk4 to induce centriole amplification. *J Cell Biol* 195: 231-243.
- 484 Carter, S. L., A. C. Eklund, I. S. Kohane, L. N. Harris and Z. Szallasi, 2006 A signature of chromosomal  
485 instability inferred from gene expression profiles predicts clinical outcome in multiple human  
486 cancers. *Nat Genet* 38: 1043-1048.
- 487 Chang, L., and D. Barford, 2014 Insights into the anaphase-promoting complex: a molecular machine  
488 that regulates mitosis. *Curr Opin Struct Biol* 29: 1-9.
- 489 Chang, L., Z. Zhang, J. Yang, S. H. McLaughlin and D. Barford, 2015 Atomic structure of the APC/C  
490 and its mechanism of protein ubiquitination. *Nature* 522: 450-454.
- 491 Cheeseman, I. M., S. Niessen, S. Anderson, F. Hyndman, J. R. Yates, 3rd *et al.*, 2004 A conserved  
492 protein network controls assembly of the outer kinetochore and its ability to sustain tension. *Genes*  
493 *Dev* 18: 2255-2268.
- 494 Church, D. L., K. L. Guan and E. J. Lambie, 1995 Three genes of the MAP kinase cascade, *mek-2*,  
495 *mpk-1/sur-1* and *let-60 ras*, are required for meiotic cell cycle progression in *Caenorhabditis*  
496 *elegans*. *Development* 121: 2525-2535.

- 497 Dammermann, A., T. Müller-Reichert, L. Pelletier, B. Habermann, A. Desai *et al.*, 2004 Centriole  
498 assembly requires both centriolar and pericentriolar material proteins. *Dev Cell* 7: 815-829.
- 499 Dawson, I. A., S. Roth and S. Artavanis-Tsakonas, 1995 The *Drosophila* cell cycle gene *fizzy* is  
500 required for normal degradation of cyclins A and B during mitosis and has homology to the CDC20  
501 gene of *Saccharomyces cerevisiae*. *J Cell Biol* 129: 725-737.
- 502 Delattre, M., C. Canard and P. Gönczy, 2006 Sequential protein recruitment in *C. elegans* centriole  
503 formation. *Curr Biol* 16: 1844-1849.
- 504 Delattre, M., S. Leidel, K. Wani, K. Baumer, J. Bamat *et al.*, 2004 Centriolar SAS-5 is required for  
505 centrosome duplication in *C. elegans*. *Nat Cell Biol* 6: 656-664.
- 506 Fang, G., H. Yu and M. W. Kirschner, 1998 Direct binding of CDC20 protein family members activates  
507 the anaphase-promoting complex in mitosis and G1. *Mol Cell* 2: 163-171.
- 508 Fay, D. S., S. Keenan and M. Han, 2002 *fzr-1* and *lin-35/Rb* function redundantly to control cell  
509 proliferation in *C. elegans* as revealed by a nonbiased synthetic screen. *Genes Dev* 16: 503-517.
- 510 Fu, J., I. M. Hagan and D. M. Glover, 2015 The centrosome and its duplication cycle. *Cold Spring Harb*  
511 *Perspect Biol* 7: a015800.
- 512 García-Higuera, I., E. Manchado, P. Dubus, M. Cañamero, J. Méndez *et al.*, 2008 Genomic stability  
513 and tumour suppression by the APC/C cofactor Cdh1. *Nat Cell Biol* 10: 802-811.
- 514 Glotzer, M., A. W. Murray and M. W. Kirschner, 1991 Cyclin is degraded by the ubiquitin pathway.  
515 *Nature* 349: 132-138.
- 516 Golden, A., P. L. Sadler, M. R. Wallenfang, J. M. Schumacher, D. R. Hamill *et al.*, 2000 Metaphase to  
517 anaphase (*mat*) transition-defective mutants in *Caenorhabditis elegans*. *J Cell Biol* 151: 1469-1482.
- 518 Gönczy, P., 2015 Centrosomes and cancer: revisiting a long-standing relationship. *Nat Rev Cancer* 15:  
519 639-652.
- 520 Green, R. A., H. L. Kao, A. Audhya, S. Arur, J. R. Mayers *et al.*, 2011 A high-resolution *C. elegans*  
521 essential gene network based on phenotypic profiling of a complex tissue. *Cell* 145: 470-482.
- 522

- 523 Habedanck, R., Y. D. Stierhof, C. J. Wilkinson and E. A. Nigg, 2005 The Polo kinase Plk4 functions in  
524 centriole duplication. *Nat Cell Biol* 7: 1140-1146.
- 525 Hartwell, L. H., and D. Smith, 1985 Altered fidelity of mitotic chromosome transmission in cell cycle  
526 mutants of *S. cerevisiae*. *Genetics* 110: 381-395.
- 527 He, J., W. C. Chao, Z. Zhang, J. Yang, N. Cronin *et al.*, 2013 Insights into degron recognition by APC/C  
528 coactivators from the structure of an Acm1-Cdh1 complex. *Mol Cell* 50: 649-660.
- 529 Holland, A. J., W. Lan, S. Niessen, H. Hoover and D. W. Cleveland, 2010 Polo-like kinase 4 kinase  
530 activity limits centrosome overduplication by autoregulating its own stability. *J Cell Biol* 188: 191-  
531 198.
- 532 Irniger, S., and K. Nasmyth, 1997 The anaphase-promoting complex is required in G1 arrested yeast  
533 cells to inhibit B-type cyclin accumulation and to prevent uncontrolled entry into S-phase. *J Cell Sci*  
534 110 ( Pt 13): 1523-1531.
- 535 Kemp, C. A., K. R. Kopish, P. Zipperlen, J. Ahringer and K. F. O'Connell, 2004 Centrosome maturation  
536 and duplication in *C. elegans* require the coiled-coil protein SPD-2. *Dev Cell* 6: 511-523.
- 537 Kemp, C. A., M. H. Song, M. K. Addepalli, G. Hunter and K. O'Connell, 2007 Suppressors of *zyg-1*  
538 define regulators of centrosome duplication and nuclear association in *Caenorhabditis elegans*.  
539 *Genetics* 176: 95-113.
- 540 Kirkham, M., T. Müller-Reichert, K. Oegema, S. Grill and A. A. Hyman, 2003 SAS-4 is a *C. elegans*  
541 centriolar protein that controls centrosome size. *Cell* 112: 575-587.
- 542 Kitagawa, R., E. Law, L. Tang and A. M. Rose, 2002 The Cdc20 homolog, FZY-1, and its interacting  
543 protein, IFY-1, are required for proper chromosome segregation in *Caenorhabditis elegans*. *Curr*  
544 *Biol* 12: 2118-2123.
- 545 Kleylein-Sohn, J., J. Westendorf, M. Le Clech, R. Habedanck, Y. D. Stierhof *et al.*, 2007 Plk4-induced  
546 centriole biogenesis in human cells. *Dev Cell* 13: 190-202.
- 547 Kops, G. J., M. van der Voet, M. S. Manak, M. H. van Osch, S. M. Naini *et al.*, 2010 APC16 is a  
548 conserved subunit of the anaphase-promoting complex/cyclosome. *J Cell Sci* 123: 1623-1633.

- 549 Kraft, C., H. C. Vodermaier, S. Maurer-Stroh, F. Eisenhaber and J. M. Peters, 2005 The WD40  
550 propeller domain of Cdh1 functions as a destruction box receptor for APC/C substrates. *Mol Cell*  
551 18: 543-553.
- 552 Kumar, A., S. C. Girimaji, M. R. Duvvari and S. H. Blanton, 2009 Mutations in STIL, encoding a  
553 pericentriolar and centrosomal protein, cause primary microcephaly. *Am J Hum Genet* 84: 286-290.
- 554 Leidel, S., M. Delattre, L. Cerutti, K. Baumer and P. Gönczy, 2005 SAS-6 defines a protein family  
555 required for centrosome duplication in *C. elegans* and in human cells. *Nat Cell Biol* 7: 115-125.
- 556 Leidel, S., and P. Gönczy, 2003 SAS-4 is essential for centrosome duplication in *C. elegans* and is  
557 recruited to daughter centrioles once per cell cycle. *Dev Cell* 4: 431-439.
- 558 Levine, M. S., B. Bakker, B. Boeckx, J. Moyett, J. Lu *et al.*, 2017 Centrosome Amplification Is Sufficient  
559 to Promote Spontaneous Tumorigenesis in Mammals. *Dev Cell* 40: 313-322 e315.
- 560 Livneh, I., V. Cohen-Kaplan, C. Cohen-Rosenzweig, N. Avni and A. Ciechanover, 2016 The life cycle of  
561 the 26S proteasome: from birth, through regulation and function, and onto its death. *Cell Res* 26:  
562 869-885.
- 563 Medley, J. C., M. M. Kabara, M. D. Stubenvoll, L. E. DeMeyer and M. H. Song, 2017 Casein kinase II is  
564 required for proper cell division and acts as a negative regulator of centrosome duplication in  
565 *Caenorhabditis elegans* embryos. *Biol Open* 6: 17-28.
- 566 Meghini, F., T. Martins, X. Tait, K. Fujimitsu, H. Yamano *et al.*, 2016 Targeting of Fzr/Cdh1 for timely  
567 activation of the APC/C at the centrosome during mitotic exit. *Nat Commun* 7: 12607.
- 568 Miller, J. G., Y. Liu, C. W. Williams, H. E. Smith and K. F. O'Connell, 2016 The E2F-DP1 Transcription  
569 Factor Complex Regulates Centriole Duplication in *Caenorhabditis elegans*. *G3 (Bethesda)* 6: 709-  
570 720.
- 571 Nigg, E. A., and T. Stearns, 2011 The centrosome cycle: Centriole biogenesis, duplication and inherent  
572 asymmetries. *Nat Cell Biol* 13: 1154-1160.
- 573 O'Connell, K. F., C. Caron, K. R. Kopish, D. D. Hurd, K. J. Kemphues *et al.*, 2001 The *C. elegans zyg-1*  
574 gene encodes a regulator of centrosome duplication with distinct maternal and paternal roles in the  
575 embryo. *Cell* 105: 547-558.

- 576 Paix, A., A. Folkmann, D. Rasoloson and G. Seydoux, 2015 High Efficiency, Homology-Directed  
577 Genome Editing in *Caenorhabditis elegans* Using CRISPR-Cas9 Ribonucleoprotein Complexes.  
578 Genetics 201: 47-54.
- 579 Pelletier, L., E. O'Toole, A. Schwager, A. A. Hyman and T. Müller-Reichert, 2006 Centriole assembly in  
580 *Caenorhabditis elegans*. Nature 444: 619-623.
- 581 Pelletier, L., N. Ozlü, E. Hannak, C. Cowan, B. Habermann *et al.*, 2004 The *Caenorhabditis elegans*  
582 centrosomal protein SPD-2 is required for both pericentriolar material recruitment and centriole  
583 duplication. Curr Biol 14: 863-873.
- 584 Peters, J. M., 2006 The anaphase promoting complex/cyclosome: a machine designed to destroy. Nat  
585 Rev Mol Cell Biol 7: 644-656.
- 586 Pflieger, C. M., and M. W. Kirschner, 2000 The KEN box: an APC recognition signal distinct from the D  
587 box targeted by Cdh1. Genes Dev 14: 655-665.
- 588 Praitis, V., E. Casey, D. Collar and J. Austin, 2001 Creation of low-copy integrated transgenic lines in  
589 *Caenorhabditis elegans*. Genetics 157: 1217-1226.
- 590 Prinz, S., E. S. Hwang, R. Visintin and A. Amon, 1998 The regulation of Cdc20 proteolysis reveals a  
591 role for APC components Cdc23 and Cdc27 during S phase and early mitosis. Curr Biol 8: 750-760.
- 592 Puklowski, A., Y. Homsy, D. Keller, M. May, S. Chauhan *et al.*, 2011 The SCF-FBXW5 E3-ubiquitin  
593 ligase is regulated by PLK4 and targets HsSAS-6 to control centrosome duplication. Nat Cell Biol  
594 13: 1004-1009.
- 595 Raff, J. W., K. Jeffers and J. Y. Huang, 2002 The roles of Fzy/Cdc20 and Fzr/Cdh1 in regulating the  
596 destruction of cyclin B in space and time. J Cell Biol 157: 1139-1149.
- 597 Rogers, G. C., N. M. Rusan, D. M. Roberts, M. Peifer and S. L. Rogers, 2009 The SCF Slimb ubiquitin  
598 ligase regulates Plk4/Sak levels to block centriole reduplication. J Cell Biol 184: 225-239.
- 599 Sarov, M., J. I. Murray, K. Schanze, A. Pozniakovski, W. Niu *et al.*, 2012 A genome-scale resource for  
600 *in vivo* tag-based protein function exploration in *C. elegans*. Cell 150: 855-866.
- 601 Schwab, M., A. S. Lutum and W. Seufert, 1997 Yeast Hct1 is a regulator of Clb2 cyclin proteolysis. Cell  
602 90: 683-693.

- 603 Schwab, M., M. Neutzner, D. Mocker and W. Seufert, 2001 Yeast Hct1 recognizes the mitotic cyclin  
604 Clb2 and other substrates of the ubiquitin ligase APC. *EMBO J* 20: 5165-5175.
- 605 Shakes, D. C., A. K. Allen, K. M. Albert and A. Golden, 2011 *emb-1* encodes the APC16 subunit of the  
606 *Caenorhabditis elegans* anaphase-promoting complex. *Genetics* 189: 549-560.
- 607 Shirayama, M., W. Zachariae, R. Ciosk and K. Nasmyth, 1998 The Polo-like kinase Cdc5p and the WD-  
608 repeat protein Cdc20p/*fizzy* are regulators and substrates of the anaphase promoting complex in  
609 *Saccharomyces cerevisiae*. *EMBO J* 17: 1336-1349.
- 610 Sigrist, S. J., and C. F. Lehner, 1997 *Drosophila fizzy*-related down-regulates mitotic cyclins and is  
611 required for cell proliferation arrest and entry into endocycles. *Cell* 90: 671-681.
- 612 Song, L., and M. Rape, 2008 Reverse the curse--the role of deubiquitination in cell cycle control. *Curr*  
613 *Opin Cell Biol* 20: 156-163.
- 614 Song, L., and M. Rape, 2011 Substrate-specific regulation of ubiquitination by the anaphase-promoting  
615 complex. *Cell Cycle* 10: 52-56.
- 616 Song, M. H., L. Aravind, T. Müller-Reichert and K. F. O'Connell, 2008 The conserved protein SZY-20  
617 opposes the Plk4-related kinase ZYG-1 to limit centrosome size. *Dev Cell* 15: 901-912.
- 618 Song, M. H., Y. Liu, D. E. Anderson, W. J. Jahng and K. F. O'Connell, 2011 Protein phosphatase 2A-  
619 SUR-6/B55 regulates centriole duplication in *C. elegans* by controlling the levels of centriole  
620 assembly factors. *Dev Cell* 20: 563-571.
- 621 Strnad, P., S. Leidel, T. Vinogradova, U. Euteneuer, A. Khodjakov *et al.*, 2007 Regulated HsSAS-6  
622 levels ensure formation of a single procentriole per centriole during the centrosome duplication  
623 cycle. *Dev Cell* 13: 203-213.
- 624 Stubenvoll, M. D., J. C. Medley, M. Irwin and M. H. Song, 2016 ATX-2, the *C. elegans* Ortholog of  
625 Human Ataxin-2, Regulates Centrosome Size and Microtubule Dynamics. *PLoS Genet* 12:  
626 e1006370.
- 627 Tang, C. J., R. H. Fu, K. S. Wu, W. B. Hsu and T. K. Tang, 2009 CPAP is a cell-cycle regulated protein  
628 that controls centriole length. *Nat Cell Biol* 11: 825-831.



- 629 Tang, C. J., S. Y. Lin, W. B. Hsu, Y. N. Lin, C. T. Wu *et al.*, 2011 The human microcephaly protein STIL  
630 interacts with CPAP and is required for procentriole formation. *EMBO J* 30: 4790-4804.
- 631 The, I., S. Ruijtenberg, B. P. Bouchet, A. Cristobal, M. B. Prinsen *et al.*, 2015 Rb and FZR1/Cdh1  
632 determine CDK4/6-cyclin D requirement in *C. elegans* and human cancer cells. *Nat Commun* 6:  
633 5906.
- 634 Thornton, B. R., T. M. Ng, M. E. Matyskiela, C. W. Carroll, D. O. Morgan *et al.*, 2006 An architectural  
635 map of the anaphase-promoting complex. *Genes Dev* 20: 449-460.
- 636 Visintin, R., S. Prinz and A. Amon, 1997 CDC20 and CDH1: a family of substrate-specific activators of  
637 APC-dependent proteolysis. *Science* 278: 460-463.
- 638 Zhang, S., L. Chang, C. Alfieri, Z. Zhang, J. Yang *et al.*, 2016 Molecular mechanism of APC/C  
639 activation by mitotic phosphorylation. *Nature* 533: 260-264.
- 640 Zhou, Y., Y. P. Ching, R. W. Ng and D. Y. Jin, 2003 Differential expression, localization and activity of  
641 two alternatively spliced isoforms of human APC regulator CDH1. *Biochem J* 374: 349-358.
- 642 Zhu, F., S. Lawo, A. Bird, D. Pinchev, A. Ralph *et al.*, 2008 The mammalian SPD-2 ortholog Cep192  
643 regulates centrosome biogenesis. *Curr Biol* 18: 136-141.
- 644

**Table 1. Genetic Analysis**

|                                                 | °C   | % Embryonic Viability<br>(Average ± SD) | n<br>(progeny) |
|-------------------------------------------------|------|-----------------------------------------|----------------|
| <i>N2</i>                                       |      | 99.4 ± 0.7                              | 1500           |
| <i>zyg-1(it25)</i>                              |      | 0 ± 7.2                                 | 1350           |
| <i>fzr-1(bs31)</i>                              |      | 96.8 ± 5.0                              | 1200           |
| <i>zyg-1(it25);fzr-1(bs31)</i>                  |      | 44.5 ± 7.3                              | 1273           |
| <i>zyg-1(it25);fzr-1(bs38)</i>                  | 24   | 28.6 ± 10.3                             | 1004           |
| <i>zyg-1(it25); M9 buffer</i>                   |      | 0 ± 0                                   | 600            |
| <i>zyg-1(it25); fzr-1(RNAi)</i>                 |      | 10.7 ± 7.9                              | 1045           |
| <i>zyg-1(or409); M9 buffer</i>                  |      | 0 ± 0                                   | 466            |
| <i>zyg-1(or409); fzr-1(RNAi)</i>                |      | 2.2 ± 0                                 | 313            |
| <i>N2</i>                                       |      | 100 ± 0                                 | 1143           |
| <i>sas-5<sup>KLEN-to-3A</sup></i>               | 24   | 99 ± 1.1                                | 1386           |
| <i>zyg-1(it25); sas-5<sup>KLEN-to-KEN</sup></i> |      | 0 ± 0                                   | 1165           |
| <i>zyg-1(it25); sas-5<sup>KLEN-to-3A</sup></i>  |      | 0 ± 0                                   | 1216           |
| <i>N2</i>                                       |      | 100 ± 0                                 | 437            |
| <i>zyg-1(it25)</i>                              | 24   | 0 ± 0                                   | 1573           |
| <i>mat-3(or180)</i>                             |      | 0 ± 0                                   | 636            |
| <i>zyg-1(it25); mat-3(or180)</i>                |      | 5.1 ± 1.2                               | 1300           |
| <i>N2</i>                                       |      | 100 ± 0                                 | 437            |
| <i>zyg-1(it25)</i>                              | 24   | 4.0 ± 5.4                               | 1159           |
| <i>emb-1(hc57)</i>                              |      | 3.2 ± 2.1                               | 1064           |
| <i>zyg-1(it25); emb-1(hc57)</i>                 |      | 3.3 ± 4.3                               | 1337           |
| <i>zyg-1(it25); sas-5<sup>KEN-to-KEN</sup></i>  | 22.5 | 4.6 ± 4.0                               | 1409           |
| <i>zyg-1(it25); sas-5<sup>KEN-to-3A</sup></i>   |      | 35.3 ± 9.2                              | 1341           |

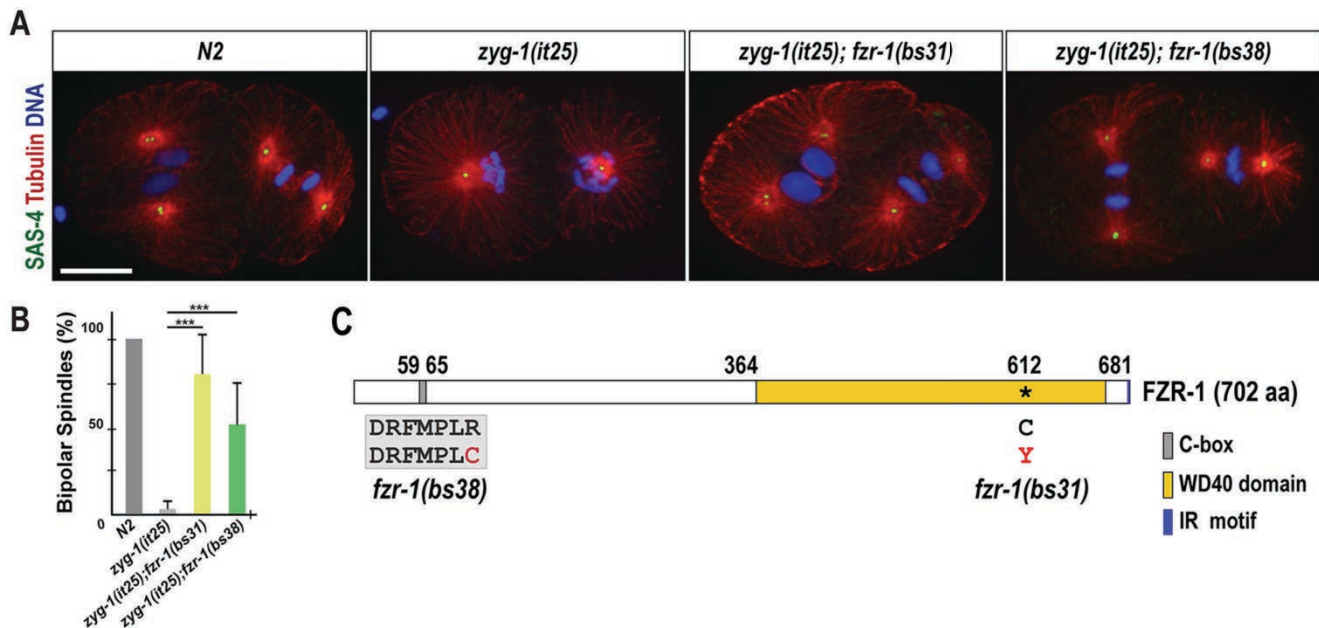

**Figure 1. *fzr-1* mutations restore bipolar spindle formation to *zyg-1(it25)*.** (A) Embryos grown at 24° stained for centrosomes (SAS-4), microtubules and DNA, illustrating mitotic spindles at the second mitosis. In *zyg-1(it25); fzr-1(bs31)* and *zyg-1(it25); fzr-1(bs38)* double mutant embryos, bipolar spindle formation is restored, whereas the *zyg-1(it25)* mutant embryo forms monopolar spindles. The *N2* embryo is shown as a wild-type control that shows bipolar spindles. Bar, 10 μm. (B) Quantification of bipolar spindle formation during the second cell cycle. At the restrictive temperature (24°), a great majority of *zyg-1(it25)* mutant embryos form monopolar spindles (3.3±4.4% bipolar spindles, n=660 blastomeres). In contrast, bipolar spindle formation is restored in *zyg-1(it25); fzr-1(bs31)* (79.9±22.0% bipolar spindles, n=276 blastomeres,  $p < 0.001$ ) and *zyg-1(it25); fzr-1(bs38)* (51.4±24.4% blastomeres, n=404 blastomeres,  $p < 0.001$ ) double mutants. Wild-type (*N2*) embryos invariably assemble bipolar spindles (100% bipolar spindles, n=600 blastomeres). Average values are presented. Error bars represent standard deviation (SD). \*\*\* $p < 0.001$  (two-tailed t-test). (C) Schematic of FZR-1 protein structure illustrates functional domains and the location of the missense mutations: R65C within the C-box in the *fzr-1(bs38)* mutant, and C612Y within WD40 domain in the *fzr-1(bs31)* mutant allele.

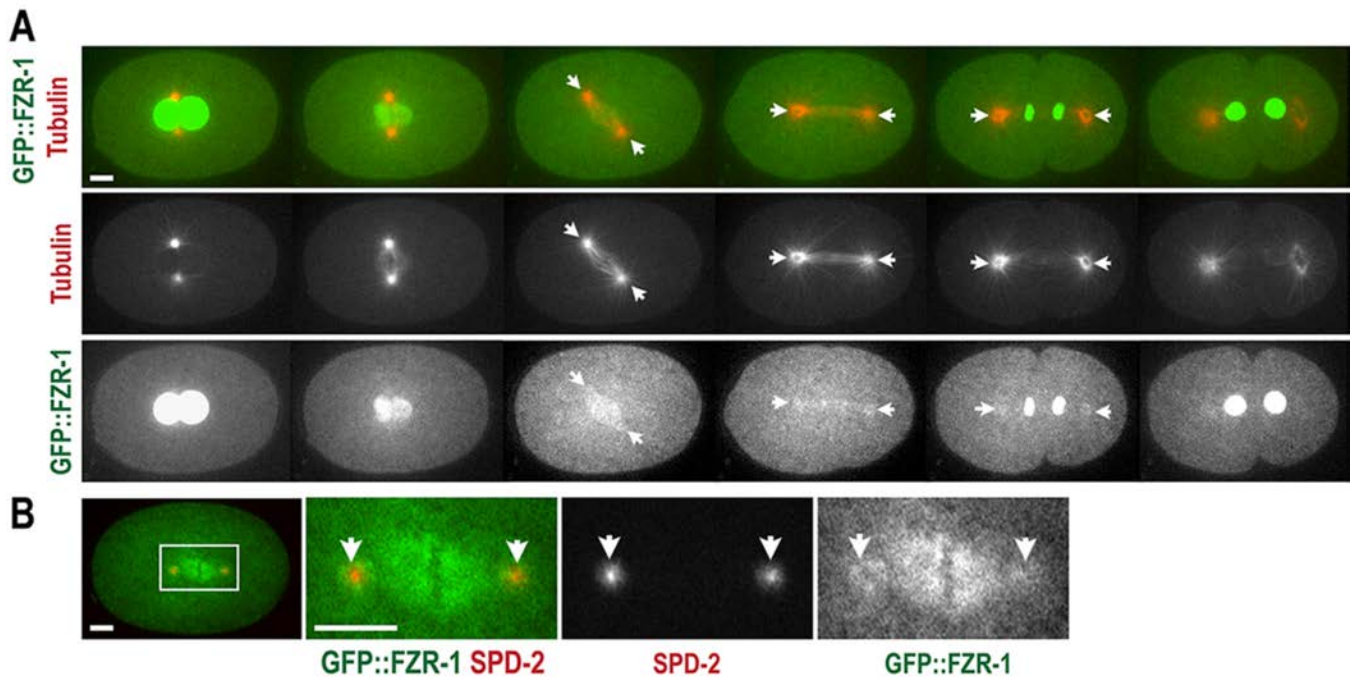

**Figure 2. Subcellular localization of FZR-1 during the first cell cycle.** (A) Still images from time-lapse movie of an embryo expressing GFP::FZR-1 and mCherry::tubulin. Movie was acquired at 1 min interval. GFP::FZR-1 localizes at nuclei, mitotic spindles and centrosomes (arrows). Expression of mCherry::tubulin used as a subcellular land-marker. (B) Embryo expressing GFP::FZR-1 and mCherry::SPD-2 displays that GFP::FZR-1 localizes to mitotic spindles and centrosomes (arrows) that co-localize with mCherry-SPD-2, a centrosome marker. Bar, 5 μm.

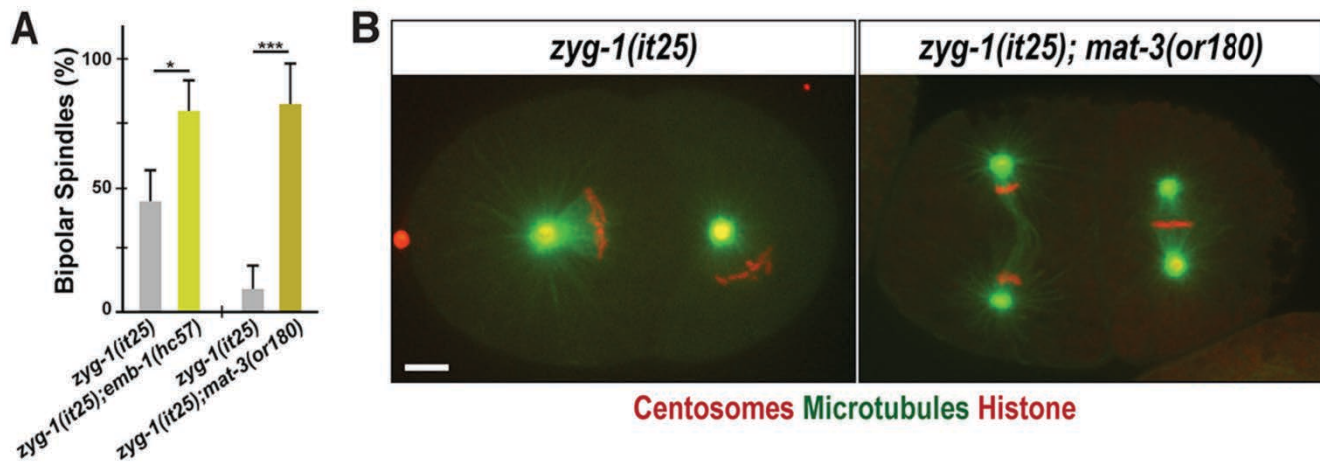

**Figure 3. Inactivating the APC/C restores bipolar spindle formation to *zyg-1(it25)*. (A)**

Quantification of bipolar spindle formation during the second cell cycle. At 22.5°, there is an increase in bipolar spindle formation in *zyg-1(it25); emb-1(hc57)* double mutants (79.1±12.4%, n=228,  $p=0.03$ ), compared to *zyg-1(it25)* single mutants (45.5±11.9%, n=238). At 24°, *zyg-1(it25); mat-3(or180)* double mutants assembled bipolar spindles at a significantly higher percentage (81.8±14.3%, n=78,  $p<0.001$ ) than *zyg-1(it25)* embryos (9.1±8.8%, n=144). n is the number of blastomeres. \* $p<0.05$ , \*\*\* $p<0.001$  (two-tailed t-test). (B) Still images of embryos expressing GFP:: $\beta$ -tubulin, mCherry:: $\gamma$ -tubulin (centrosome marker) and mCherry::histone raised at 24° illustrate monopolar spindle formation in the *zyg-1(it25)* embryo, and bipolar spindle formation in the *zyg-1(it25); mat-3(or180)* double mutant embryo. Bar, 5  $\mu$ m.

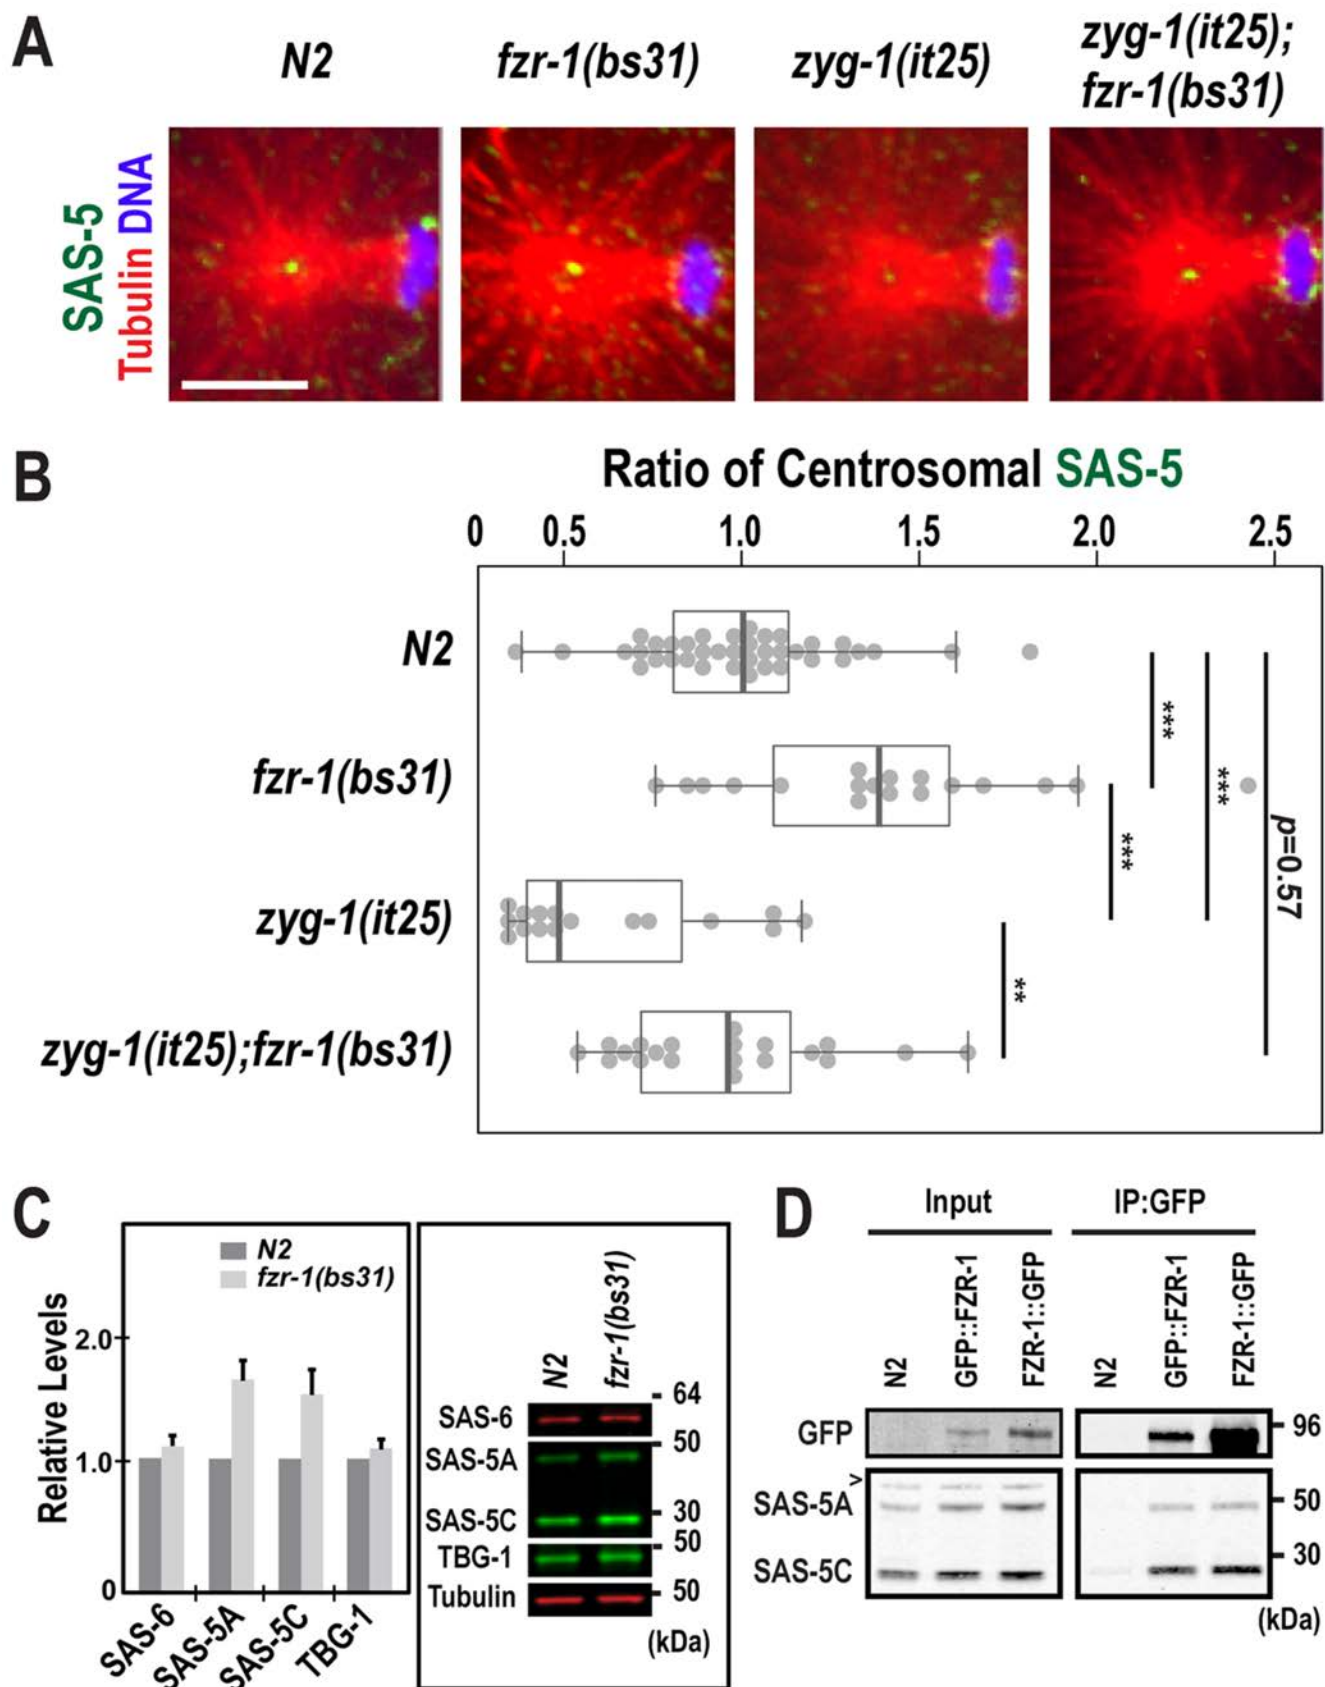

Figure 4. Loss of FZR-1 results in elevated SAS-5 levels. (A) Images of centrosomes stained for

SAS-5 (green) at the first anaphase. Bar, 5  $\mu$ m. (B) Quantification of centrosome-associated SAS-5 levels at the first anaphase. SAS-5 levels are normalized to the average fluorescence intensity in wild-type centrosomes. *fzr-1(bs31)* embryos exhibit increased levels of centrosomal SAS-5 ( $1.41\pm 0.42$  fold,  $n=18$ ;  $p<0.001$ ) relative to wild-type embryos ( $1.00\pm 0.28$  fold,  $n=38$ ). In *zyg-1(it25); fzr-1(bs31)* double mutants, centrosomal SAS-5 levels are restored to near wild-type levels ( $0.95\pm 0.44$  fold,  $n=20$ ;  $p=0.003$ ), compared to *zyg-1(it25)* embryos that show decreased levels of centrosomal SAS-5 ( $0.64\pm 0.28$  fold,  $n=16$ ).  $n$  is the number of centrosomes. Each dot represents a centrosome. Box ranges from the first through third quartile of the data. Thick bar indicates the median. Dashed line extends 1.5 times the inter-quartile range or to the minimum and maximum data point. \*\* $p<0.01$ , \*\*\* $p<0.001$  (two-tailed t-test). (C) Quantitative western blot analyses show that (left panel) *fzr-1(bs31)* mutant embryos possess increased levels of both SAS-5 isoforms, SAS-5A ( $1.56\pm 0.16$  fold) and SAS-5C ( $1.48\pm 0.19$  fold), compared to wild-type (*N2*) embryos. However, there were no significant differences in levels of either SAS-6 ( $1.09\pm 0.08$  fold) or TBG-1 ( $1.08\pm 0.07$  fold) between *fzr-1(bs31)* mutant and wild-type embryos. Four biological samples and eight technical replicates were used. Average values are presented and error bars are SD. (right panel) Representative western blot using embryonic lysates from *fzr-1(bs31)* mutants and *N2* animals. Tubulin was used as a loading control. (D) Immunoprecipitation (IP) using anti-GFP suggests that FZR-1 physically interacts with SAS-5. Both SAS-5 isoforms (SAS-5A, SAS-5C) co-precipitate with GFP::FZR-1 or FZR-1::GFP. Wild-type (*N2*) embryos were used as a negative control of IP. ~1% of total embryonic lysates was loaded in the input lanes. ‘>’ indicates a non-specific detection by the SAS-5 antibody.

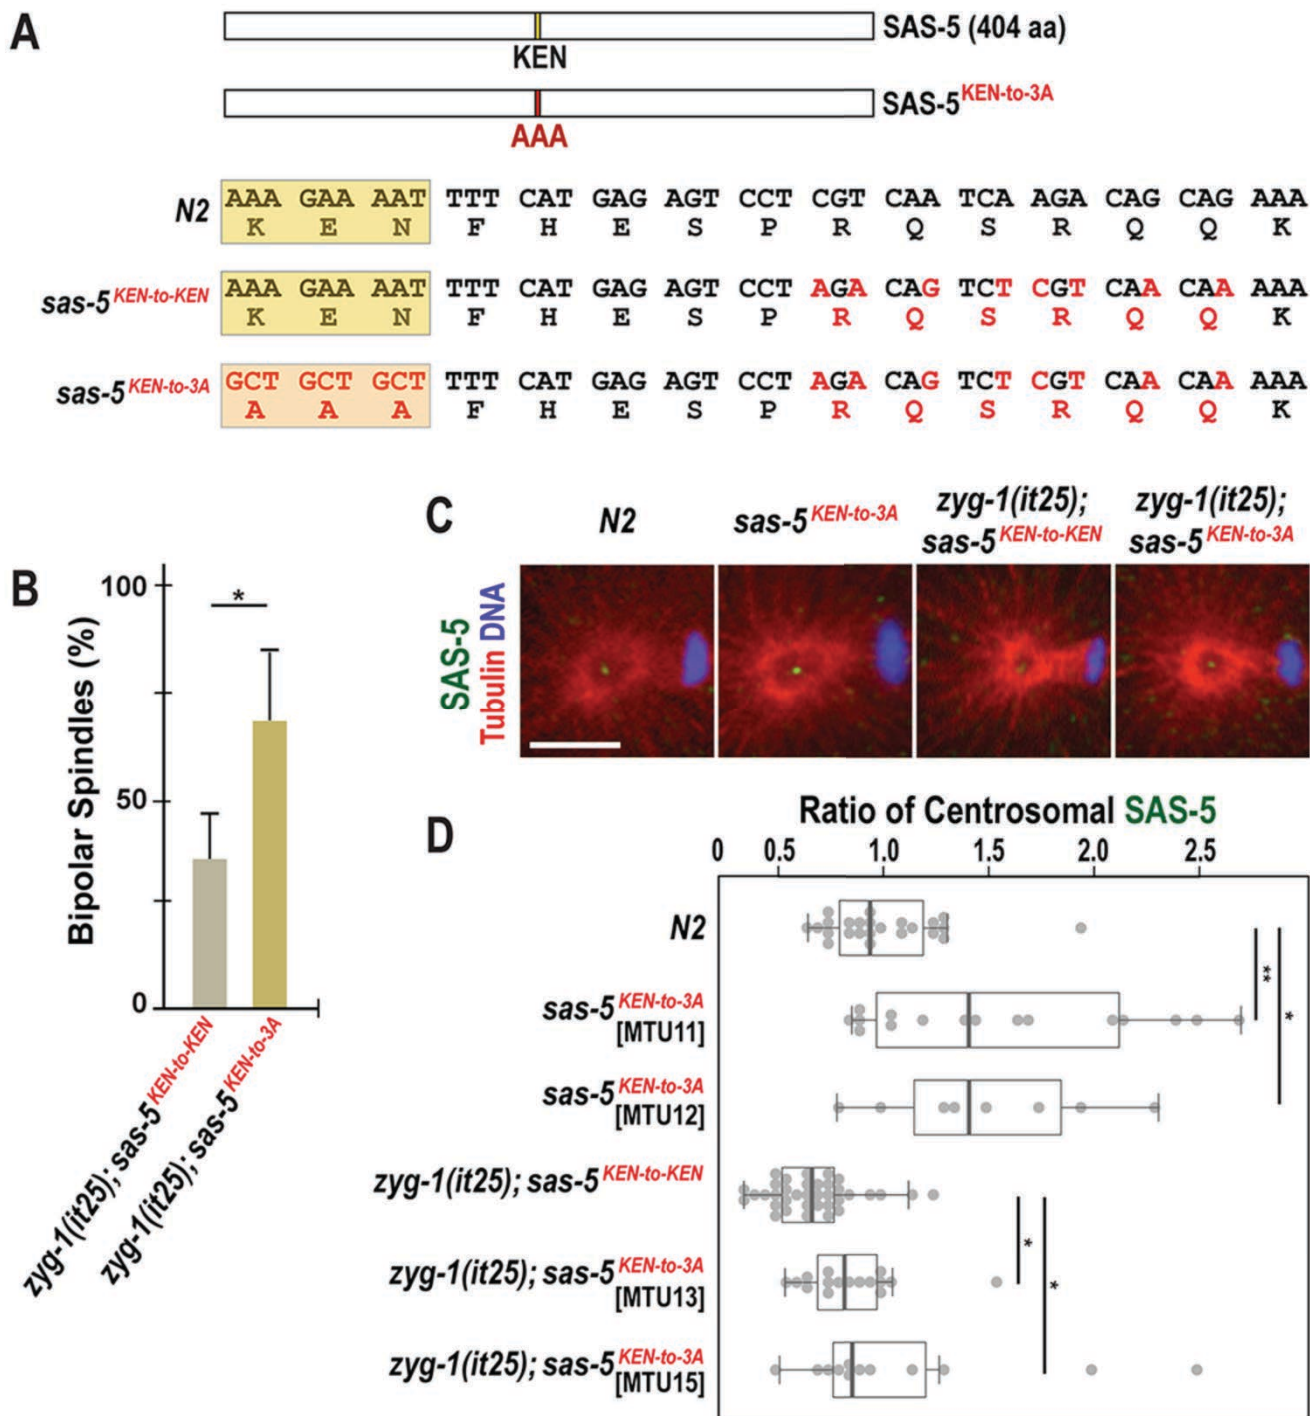

**Figure 5. Mutation of the SAS-5 KEN-box leads to increased SAS-5 levels at centrosomes and restores centrosome duplication to *zyg-1(it25)* mutants.** (A) SAS-5 contains a KEN-box (aa 213-216) motif. Mutations (red) are introduced at multiple sites to make alanine substitutions (AAA; 3A) for the KEN-box and additional silent mutations for the CRISPR genome editing (see methods and materials). The KEN-box is highlighted in yellow. Note that the *sas-5*<sup>KEN-to-KEN</sup> mutation contains the



wild-type SAS-5 protein. (B) Quantification of bipolar spindle formation during the second cell cycle in *zyg-1(it25); sas-5<sup>KEN-to-KEN</sup>* and *zyg-1(it25); sas-5<sup>KEN-to-3A</sup>* embryos at 22.5°. *zyg-1(it25); sas-5<sup>KEN-to-3A</sup>* double mutant embryos produce bipolar spindles at a higher rate (67.5±16.3%, n=124, *p*=0.02) than *zyg-1(it25); sas-5<sup>KEN-to-KEN</sup>* controls (35.1±10.7%, n=164). n is the number of blastomeres. Average values are presented and error bars are SD. (C) Centrosomes stained for SAS-5 (green) during the first anaphase. Bar, 5 µm. (D) Quantification of centrosomal SAS-5 levels during the first anaphase. We used two independently generated *sas-5<sup>KEN-to-3A</sup>* mutant lines to quantify SAS-5 levels (MTU11 and 12, Table S1). SAS-5 levels at centrosomes are normalized to the average fluorescence intensity in wild-type centrosomes. Mutating the SAS-5 KEN-box leads to increased levels of centrosomal SAS-5 in both MTU11 (1.54±0.63 fold, n=16; *p*=0.04) and MTU12 (1.48±0.50 fold, n=8; *p*=0.03), compared to wild type (1.00±0.29 fold; n=24 centrosomes). Consistently, there are a significant increase in centrosomal SAS-5 levels in both *zyg-1(it25); sas-5<sup>KEN-to-3A</sup>* double mutant lines (MTU13: 0.85±0.24 fold, n=16; *p*=0.01 and MTU15: 1.09±0.59 fold; n=12; *p*=0.03), compared to *zyg-1(it25); sas-5<sup>KEN-to-KEN</sup>* control that contains reduced levels of centrosomal SAS-5 (0.67±0.20 fold; n=36 centrosomes). n is the number of centrosomes. Each dot represents a centrosome. Box ranges from the first through third quartile of the data. Thick bar indicates the median. Dashed line extends 1.5 times the inter-quartile range or to the minimum and maximum data point. \**p*<0.05, \*\**p*<0.01 (two-tailed t-test).

## Supplemental Materials

### **APC/C<sup>FZR-1</sup> Controls SAS-5 Levels to Regulate Centrosome Duplication in *Caenorhabditis elegans***

Jeffrey C. Medley\*, Lauren E. DeMeyer\*, Megan M. Kabara\*, and Mi Hye Song\*<sup>†</sup>

\* Department of Biological Sciences, Oakland University, Rochester, MI 48309, USA.

<sup>†</sup> To whom correspondence should be addressed.

Contact Information: msong2@oakland.edu

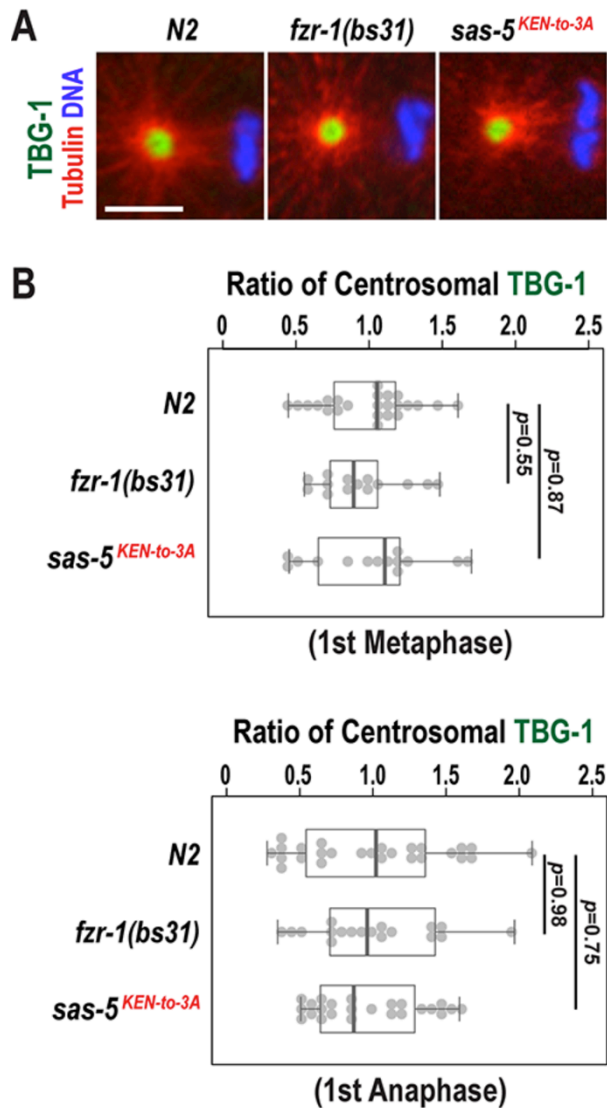

**Figure S1. Centrosome-associated TBG-1 levels are unaffected in *fzr-1(bs31)* and *sas-5<sup>KEN-to-3A</sup>* mutant embryos.** (A) Centrosomes stained for TBG-1 (green) at the first metaphase. Bar, 5 $\mu$ m. (B) Quantification of TBG-1 levels at centrosomes during the first mitosis. TBG-1 levels are normalized to the average fluorescence intensity in wild-type (*N2*) embryos. At the first metaphase, *fzr-1(bs31)* ( $0.94\pm 0.28$  fold,  $n=14$ ;  $p=0.55$ ) and *sas-5<sup>KEN-to-3A</sup>* mutants ( $1.02\pm 0.40$  fold,  $n=14$ ;  $p=0.87$ ) have comparable centrosomal TBG-1 levels to wild-type ( $1.00\pm 0.30$  fold,  $n=24$ ). At the first anaphase, centrosome-associated TBG-1 levels in both *fzr-1(bs31)* ( $0.99\pm 0.42$  fold,  $n=18$ ;  $p=0.98$ ) and *sas-5<sup>KEN-to-3A</sup>* ( $0.96\pm 0.36$  fold,  $n=24$ ;  $p=0.75$ ) mutant embryos are similar to those of wild-type ( $1.00\pm 0.52$  fold,  $n=26$ ).  $n$  is the number of centrosomes. Each dot represents a centrosome. Boxes range from the first through third quartile of the data. Thick bar indicates the median. Dashed line extends 1.5 times the inter-quartile range or to the minimum and maximum data point.

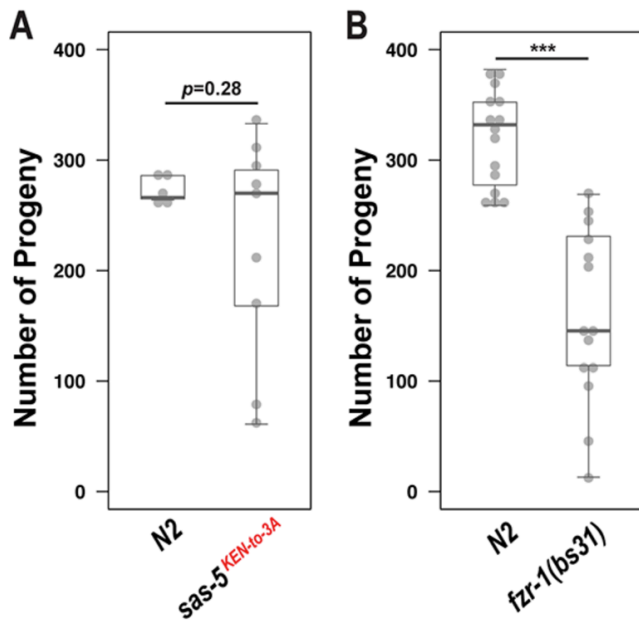

**Figure S2. Brood size in *fzf-1(bs31)* and *sas-5<sup>KEN-to-3A</sup>* mutants.** (A) *fzf-1(bs31)* mutants produce reduced brood size ( $158.4 \pm 78.4$ ,  $n=14$  hermaphrodites;  $p < 0.001$ ) compared to wild-type animals ( $319.6 \pm 43.9$ ,  $n=15$  hermaphrodites) grown at  $24^\circ$ . Note that *fzf-1(bs31)* mutants produce a wide range of distribution in brood size among 14 animals tested, which is also seen in *sas-5<sup>KEN-to-3A</sup>* mutants. (B) *sas-5<sup>KEN-to-3A</sup>* mutants display a slight reduction in brood size ( $222.7 \pm 99.7$ ,  $n=9$  hermaphrodites;  $p=0.28$ ) compared to wild-type controls ( $273.4 \pm 11.5$ ,  $n=5$  hermaphrodites) grown at  $24^\circ$ . Compared to wild-type animals, *sas-5<sup>KEN-to-3A</sup>* mutant animals produce highly irregular number of progeny in the population of nine animals tested under the same condition. Each dot represents the total number of progeny produced by a single animal. Box ranges from the first through third quartile of the data. Thick bar indicates the median. Dashed line extends 1.5 times the inter-quartile range or to the minimum and maximum data point.

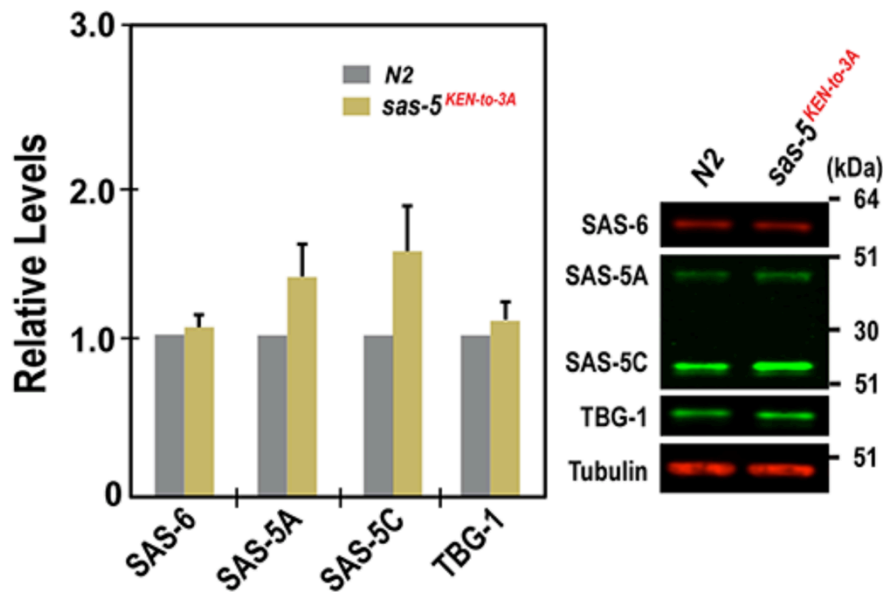

**Figure S3. SAS-5 levels are increased in *sas-5*<sup>KEN-to-3A</sup> mutants.** Quantitative western blot reveal that (left panel) *sas-5*<sup>KEN-to-3A</sup> mutant embryos contain increased levels of both SAS-5 isoforms, SAS-5A (1.36±0.20 fold) and SAS-5C (1.52±0.28 fold), compared to wild-type (*N2*) embryos. In contrast, there were no significant changes in either SAS-6 (1.05±0.04 fold) or TBG-1 (1.09±0.11 fold) levels between *sas-5*<sup>KEN-to-3A</sup> mutant and wild-type embryos. Four biological samples and six technical replicates were used for the statistical analysis. Average values are presented and error bars are SD. (right panel) Representative western blot using embryonic lysates from *sas-5*<sup>KEN-to-3A</sup> mutants and *N2* animals. Tubulin was used as a loading control.

**Table S1. List of *C. elegans* Strains Used in This Study**

| Name   | Genotype                                                                                                                | Origin                                               |
|--------|-------------------------------------------------------------------------------------------------------------------------|------------------------------------------------------|
| N2     | <i>wild-type</i>                                                                                                        | CGC                                                  |
| CB4856 | <i>wild-type, Hawaiian variant</i>                                                                                      | CGC                                                  |
| CB120  | <i>unc-4(e120) II</i>                                                                                                   | Brenner 1974                                         |
| CB128  | <i>dpy-10(e128) II</i>                                                                                                  | Brenner 1974                                         |
| MJ57   | <i>emb-1(hc57) III</i>                                                                                                  | Schierenberg <i>et al.</i> 1980                      |
| MTU6   | <i>fzr-1(bs31) II</i>                                                                                                   | This study                                           |
| MTU7   | <i>mat-3(or180) III</i>                                                                                                 | Golden <i>et al.</i> 2000                            |
| MTU8   | <i>zyg-1(it25) II; mat-3(or180) III</i>                                                                                 | This study                                           |
| MTU9   | <i>zyg-1(it25) II; emb-1(hc57) III</i>                                                                                  | This study                                           |
| MTU10  | <i>unc-119(ed3) III; [unc-119(+); fzr-1p::fzr-1::gfp::fzr-1 3'UTR]</i>                                                  | This study<br>Sarov <i>et al.</i> 2012               |
| MTU11  | <i>sas-5(mhs357) [sas-5<sup>KEN-to-3A</sup>] V</i>                                                                      | This study                                           |
| MTU12  | <i>sas-5(mhs358) [sas-5<sup>KEN-to-3A</sup>] V</i>                                                                      | This study                                           |
| MTU13  | <i>zyg-1(it25) II; sas-5(mhs359) [sas-5<sup>KEN-to-3A</sup>] V</i>                                                      | This study                                           |
| MTU14  | <i>zyg-1(it25) II; sas-5(mhs361) [SAS-5<sup>KEN-to-KEN</sup>] V</i>                                                     | This study                                           |
| MTU15  | <i>zyg-1(it25) II; sas-5(mhs362) [sas-5<sup>KEN-to-3A</sup>] V</i>                                                      | This study                                           |
| OC13   | <i>zyg-1(or409) II</i>                                                                                                  | Kemp <i>et al.</i> 2007                              |
| OC14   | <i>zyg-1(it25) II</i>                                                                                                   | Kemphues <i>et al.</i> 1988                          |
| OC130  | <i>zyg-1(it25); fzr-1(bs38) II</i>                                                                                      | Kemp <i>et al.</i> 2007                              |
| OC190  | <i>unc-119(ed3) III; bsIs6 [unc-119(+), pie-1p::gfp::fzr-1]</i>                                                         | This study                                           |
| OC201  | <i>zyg-1(it25); fzr-1(bs31) II</i>                                                                                      | Kemp <i>et al.</i> 2007                              |
| OC481  | <i>unc-119(ed3) III; bsIs15[pNP99; unc-119(+), tbb-1p::mCherry::tbb-2::tbb-2 3'UTR]</i>                                 | Gift from O'Connell Lab<br>Medley <i>et al.</i> 2017 |
| OC740  | <i>bsSi15[pKO109; unc-119(+), spd-2p::spd-2::mCherry::spd-2 3'UTR] I</i>                                                | Peel <i>et al.</i> 2017                              |
| SA250  | <i>tjIs54[pie-1p::GFP::tbb-2 + pie-1p::2xmCherry::tbg-1 + unc-119(+)]; tjIs57[pie-1p::mCherry::his-48 + unc-119(+)]</i> | Toya <i>et al.</i> 2010                              |

**Table S2. List of Oligonucleotides for CRISPR/Cas9 Genome Editing**

| Construct                                            | Sequence (5'-3')                                                                                                           |
|------------------------------------------------------|----------------------------------------------------------------------------------------------------------------------------|
| <i>sas-5</i> (KEN-box) crRNA                         | UUCUGCUGUCUUGAUUGACG                                                                                                       |
| <i>dpy-10</i> crRNA<br>(Arribere <i>et al.</i> 2014) | GCUACCAUAGGCACCACGAG                                                                                                       |
| SAS-5-KEN-AAA ssODN                                  | CTAAACAGCAAGCGATCGAACCAGTTGAAAAAGACGCTG<br>CTGCTTTTCATGAGAGTCCTAGACAGTCTCGTCAACAAAA<br>GCCAGCTAGTAAAGTGAGAATTCAGATAAAAAATA |
| <i>dpy-10</i> ssODN<br>(Arribere <i>et al.</i> 2014) | CACTTGAACCTCAATACGGCAAGATGAGAATGACTGGAAA<br>CCGTACCGCATGCGGTGCCTATGGTAGCGGAGCTTCACA<br>TGGCTTCAGACCAACAGCCTAT              |

## Supplemental References

Arribere, J. A., R. T. Bell, B. X. Fu, K. L. Artiles, P. S. Hartman *et al.*, 2014 Efficient marker-free recovery of custom genetic modifications with CRISPR/Cas9 in *Caenorhabditis elegans*. *Genetics* 198: 837-846.

Brenner, S., 1974 The genetics of *Caenorhabditis elegans*. *Genetics* 77: 71-94.

Golden, A., P. L. Sadler, M. R. Wallenfang, J. M. Schumacher, D. R. Hamill *et al.*, 2000 Metaphase to anaphase (*mat*) transition-defective mutants in *Caenorhabditis elegans*. *J Cell Biol* 151: 1469-1482.

Kemp, C. A., M. H. Song, M. K. Addepalli, G. Hunter and K. O'Connell, 2007 Suppressors of *zyg-1* define regulators of centrosome duplication and nuclear association in *Caenorhabditis elegans*. *Genetics* 176: 95-113.

Kemphues, K. J., M. Kusch and N. Wolf, 1988 Maternal-effect lethal mutations on linkage group II of *Caenorhabditis elegans*. *Genetics* 120: 977-986.

Medley, J. C., M. M. Kabara, M. D. Stubenvoll, L. E. DeMeyer and M. H. Song, 2017 Casein kinase II is required for proper cell division and acts as a negative regulator of centrosome duplication in *Caenorhabditis elegans* embryos. *Biol Open* 6: 17-28.

Peel, N., J. Iyer, A. Naik, M. P. Dougherty, M. Decker *et al.*, 2017 Protein Phosphatase 1 Down Regulates ZYG-1 Levels to Limit Centriole Duplication. *PLoS Genet* 13: e1006543.

Sarov, M., J. I. Murray, K. Schanze, A. Pozniakovski, W. Niu *et al.*, 2012 A genome-scale resource for *in vivo* tag-based protein function exploration in *C. elegans*. *Cell* 150: 855-866.

Schierenberg, E., J. Miwa and G. von Ehrenstein, 1980 Cell lineages and developmental defects of temperature-sensitive embryonic arrest mutants in *Caenorhabditis elegans*. *Dev Biol* 76: 141-159.

Toya, M., Y. Iida and A. Sugimoto, 2010 Imaging of mitotic spindle dynamics in *Caenorhabditis elegans* embryos. *Methods Cell Biol* 97: 359-372.
